# Supplementary material for: Variations of Clinical Target Volume Delineation for Primary Site of Nasopharyngeal Cancer Among Five Centers in China
Source: PubMed Central journal article supplement (PMC7468394; doi:10.3389/fonc.2020.01572), 2020-08-20

CTVs contoured by 14 physicians in  
China for primary site of a T3N2M0 NPC  
presented as percentile agreement

Centers participated

National Cancer Center of China

Fudan University Shanghai Cancer Center

Sichuan Cancer Hospital

Sun Yat-Sen University Cancer Center

Fujian Cancer Hospital

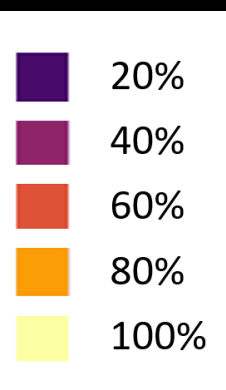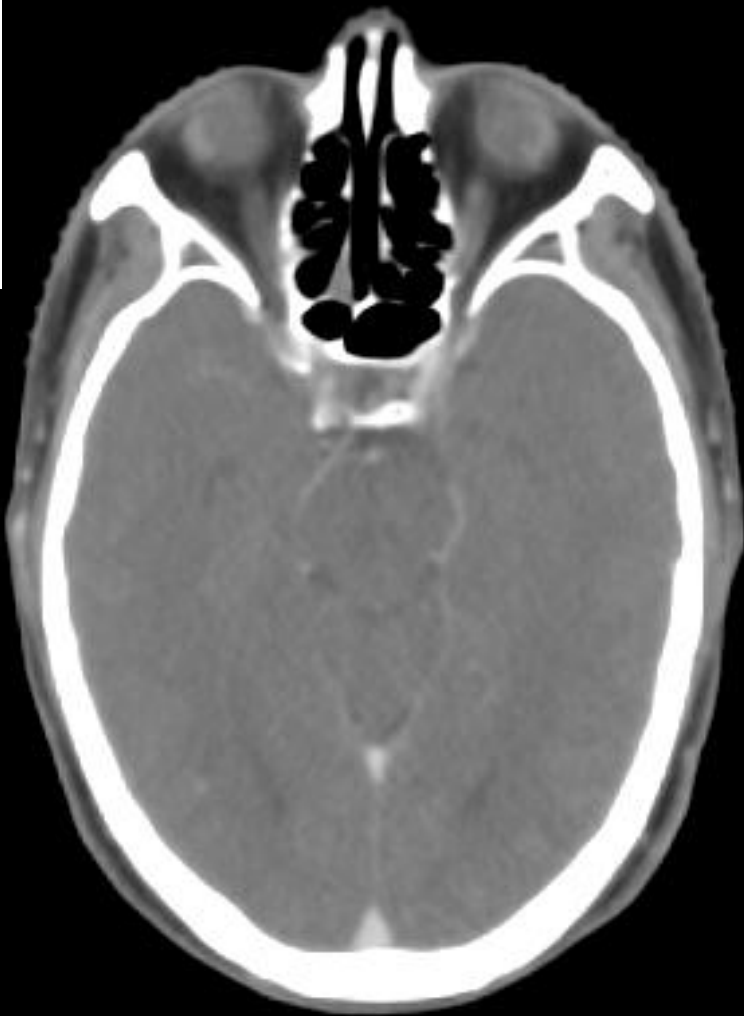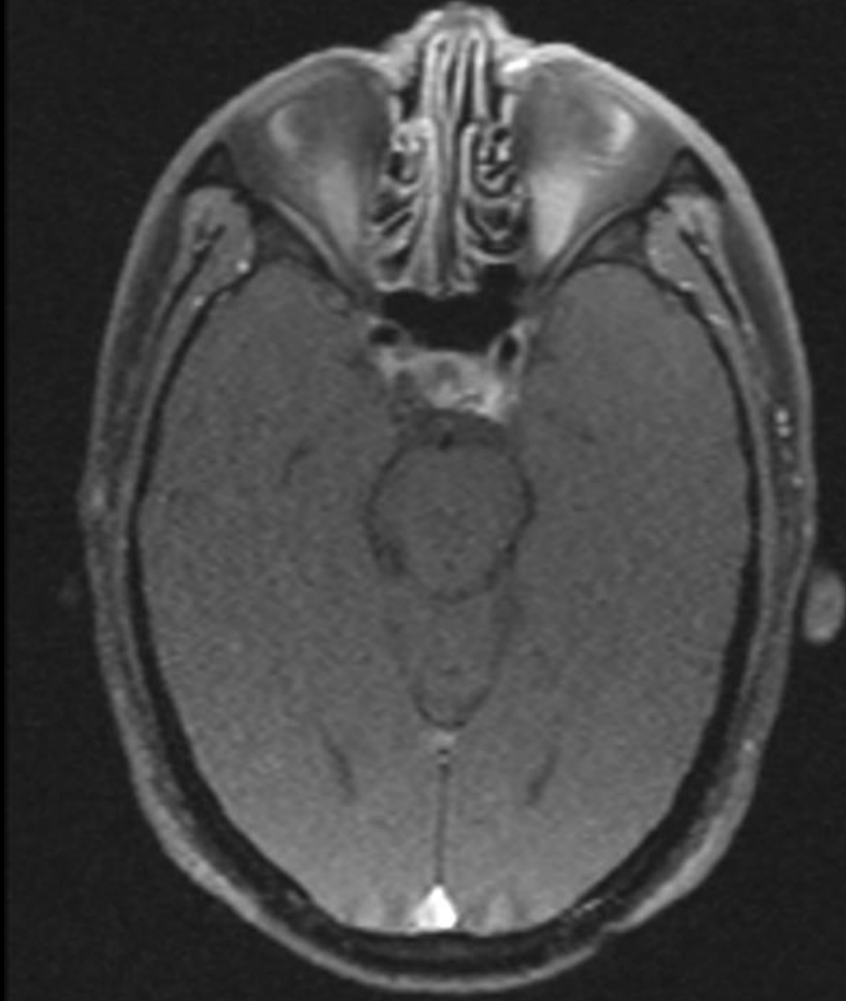

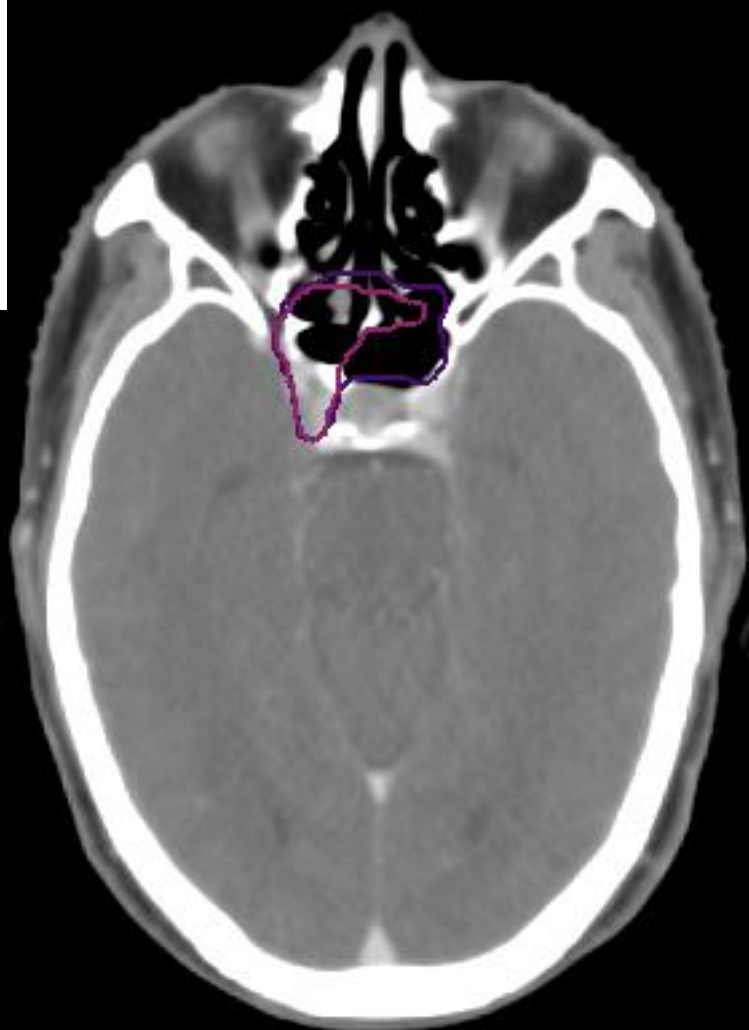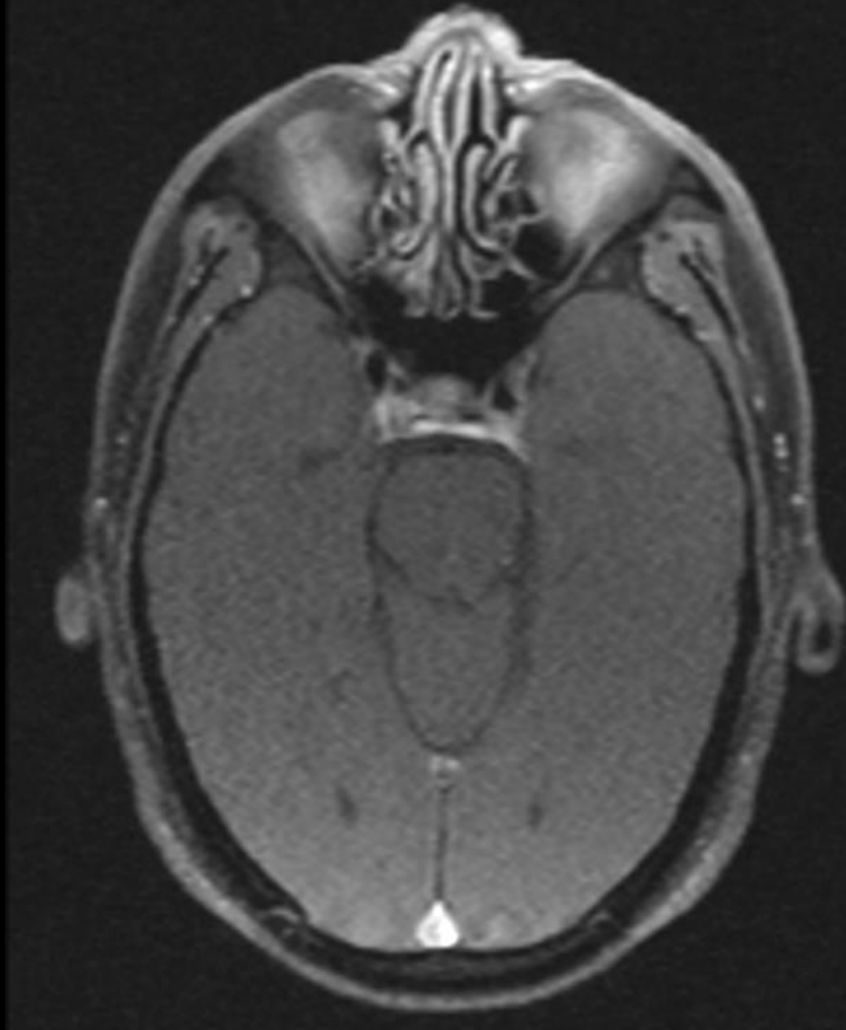

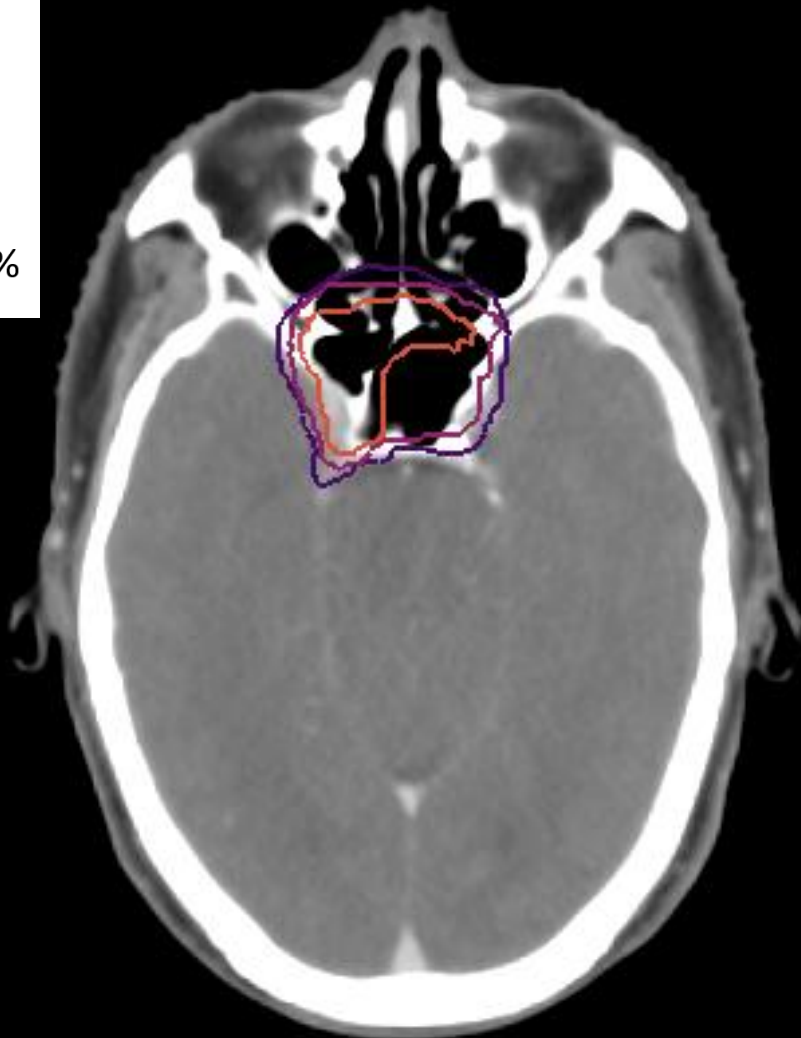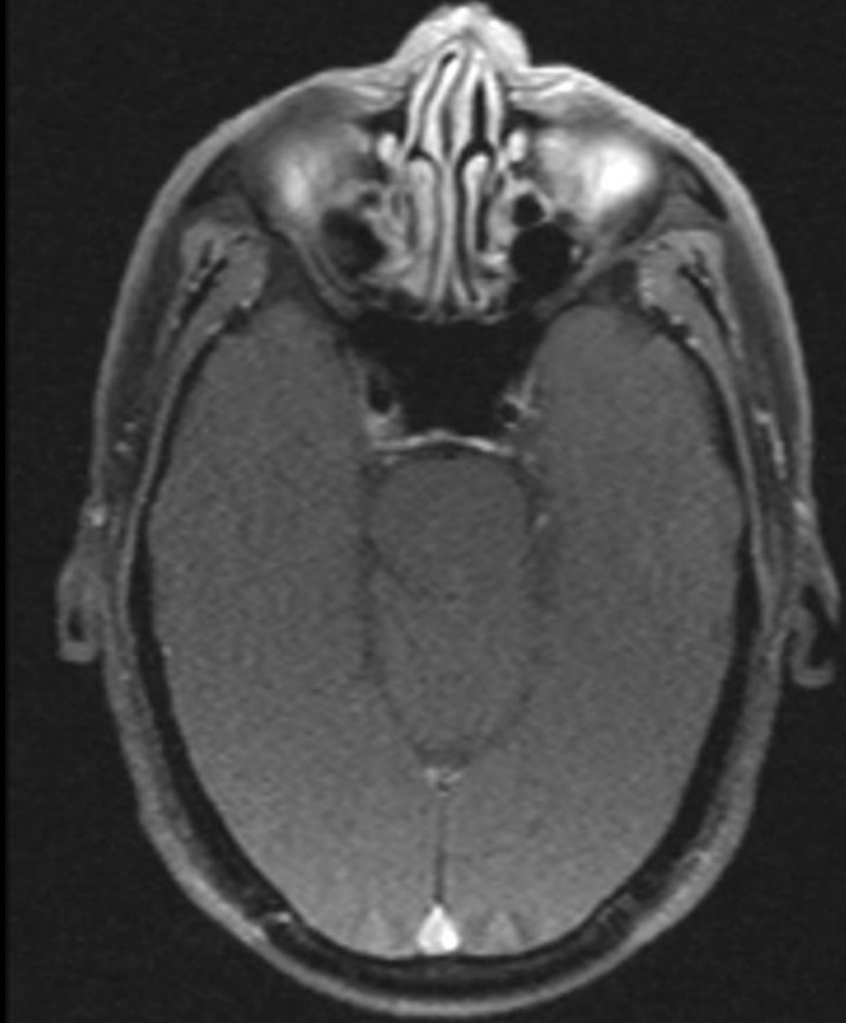

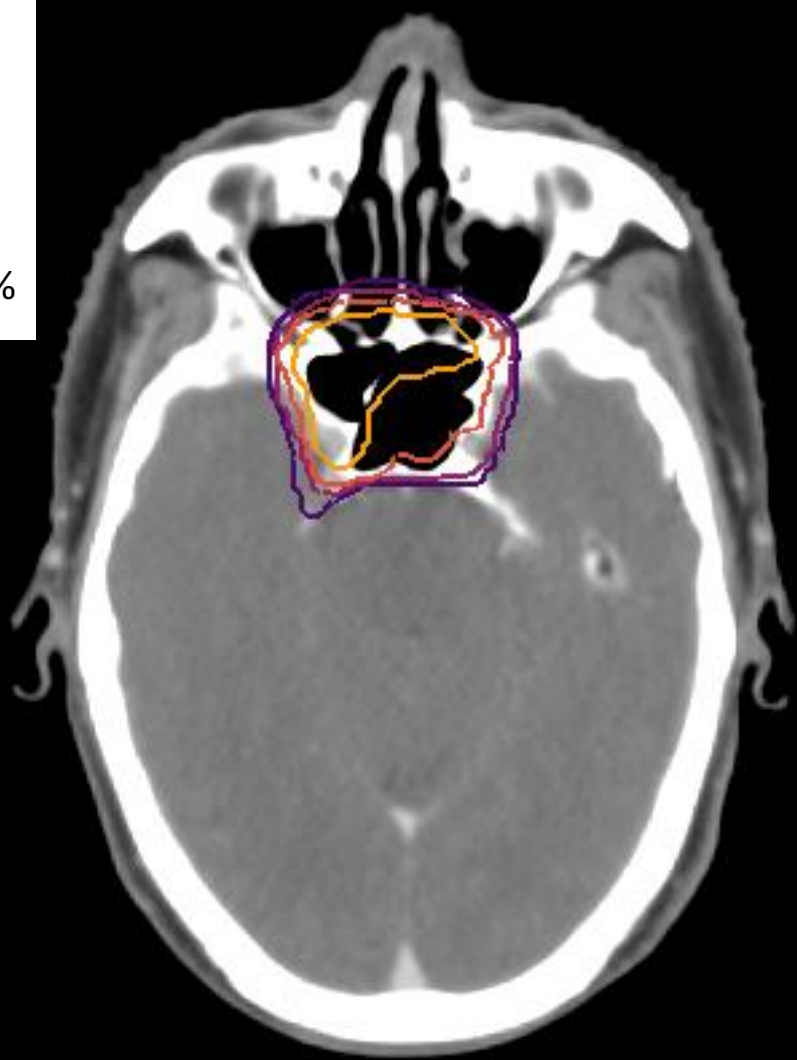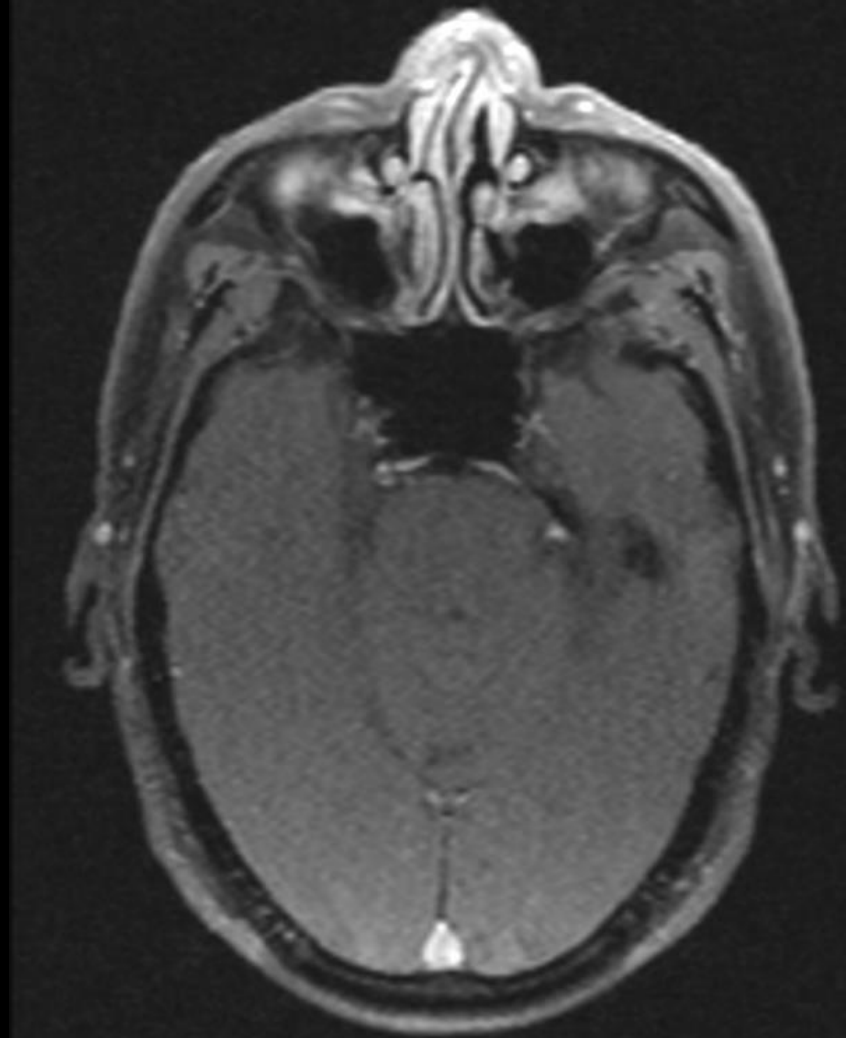

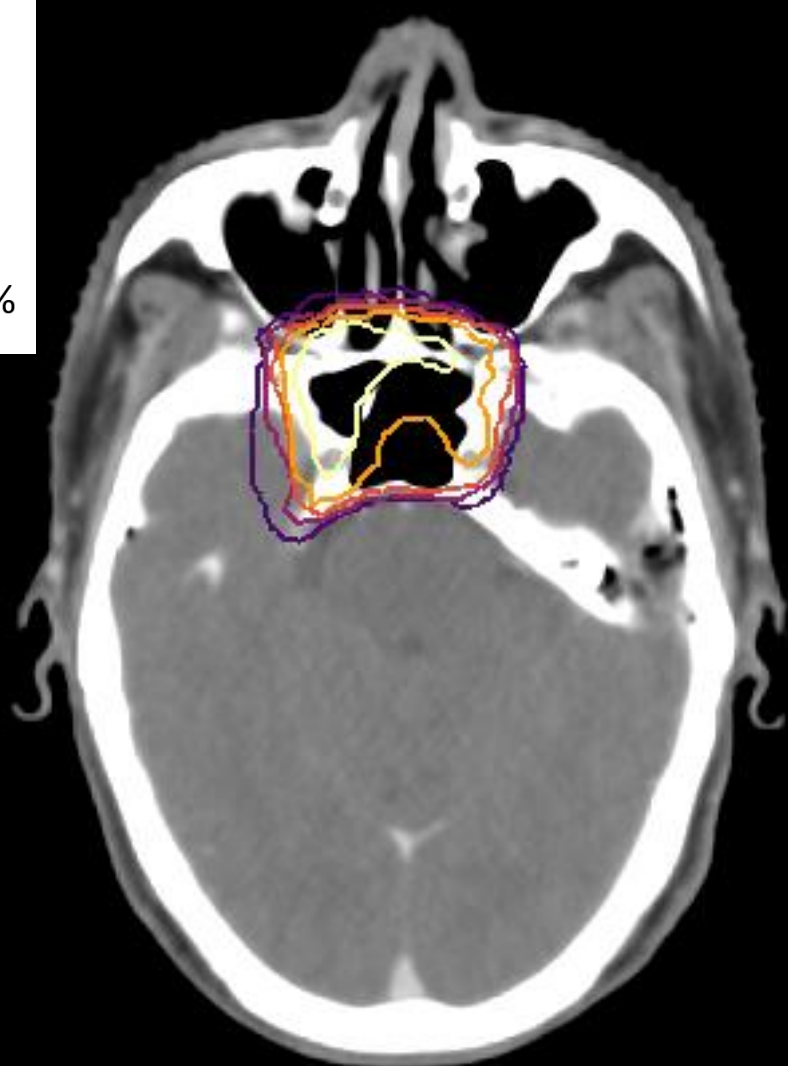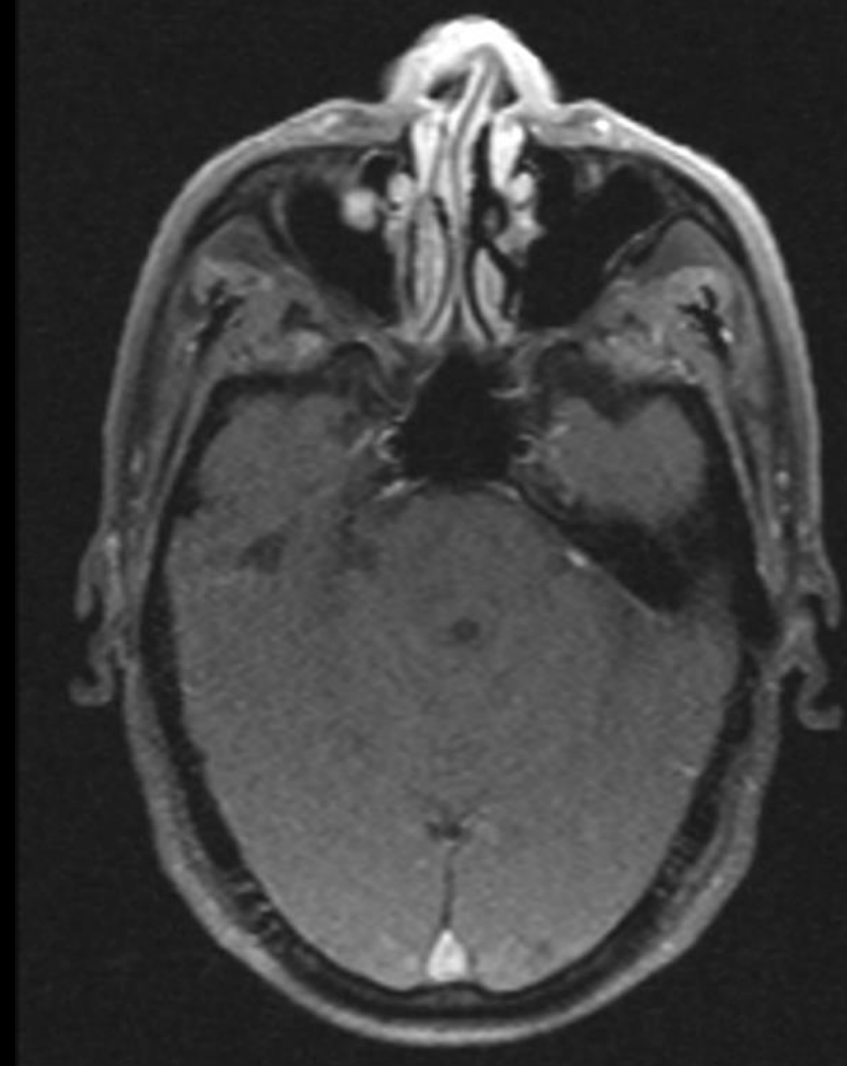

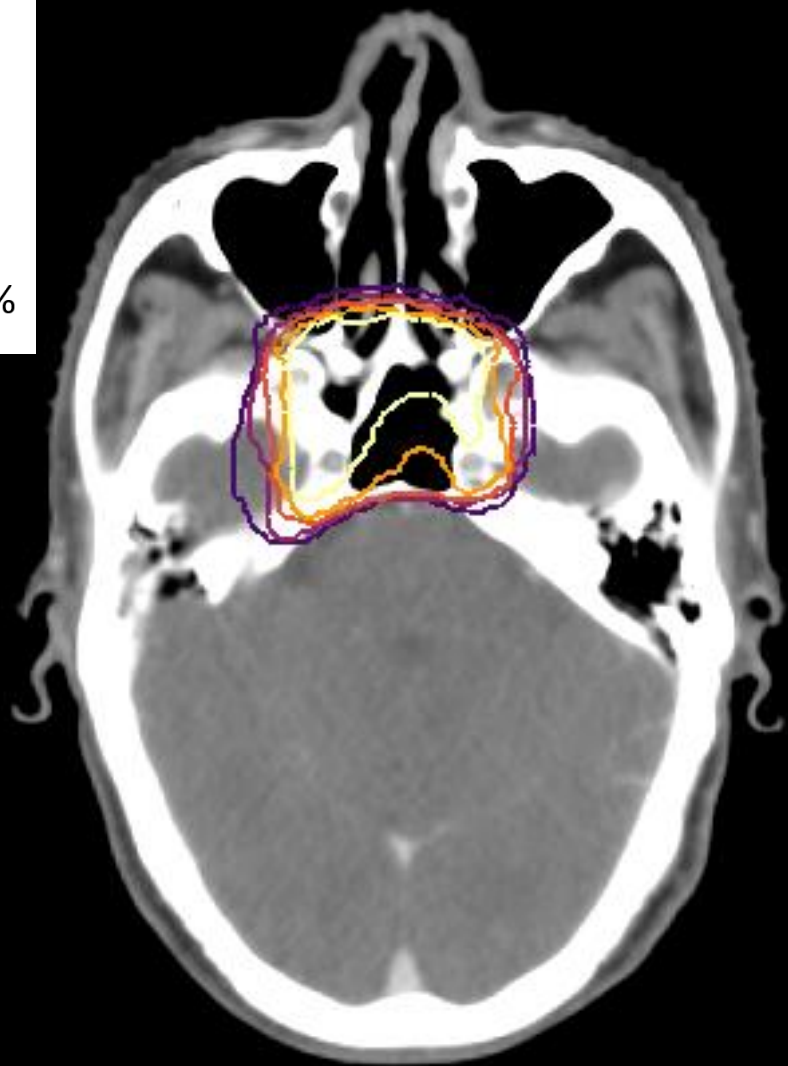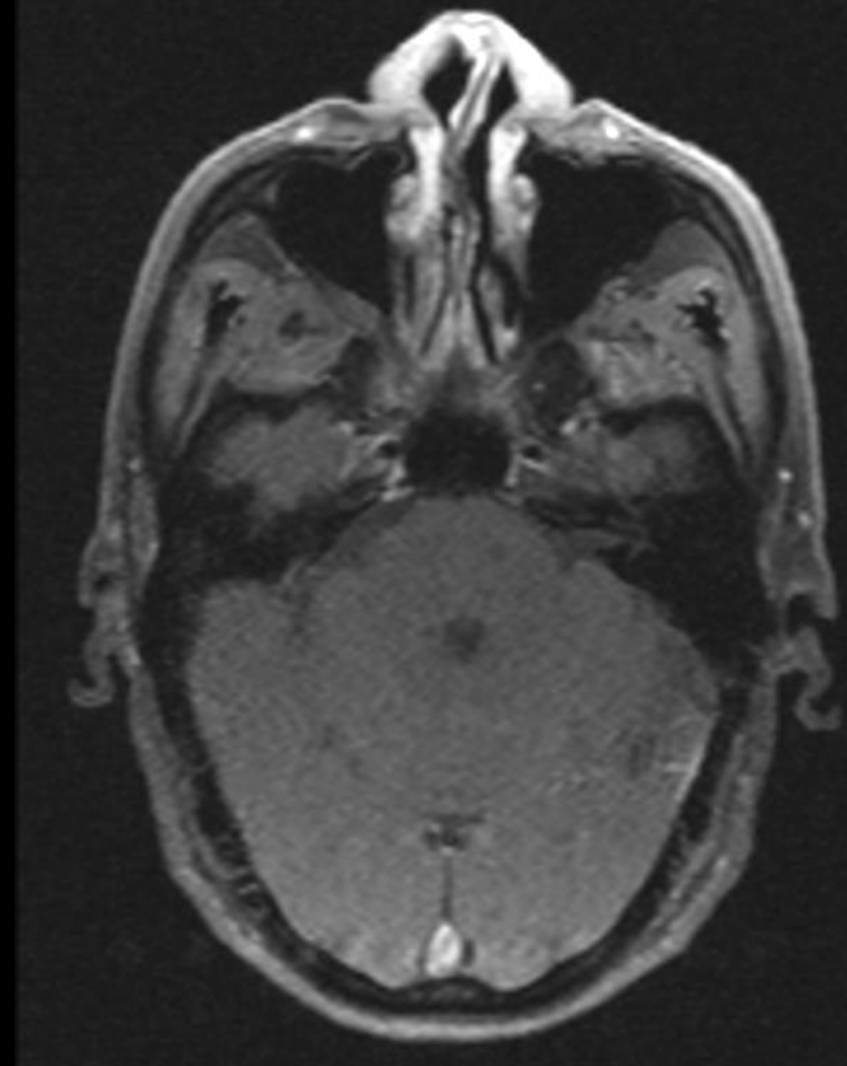

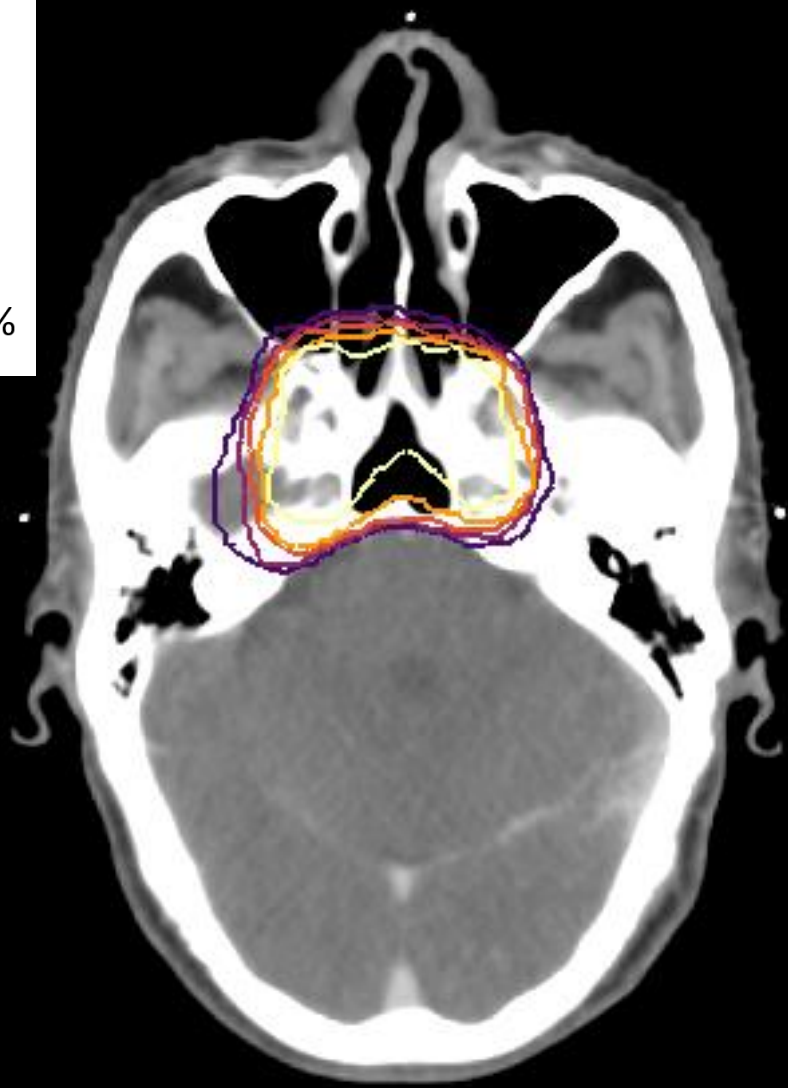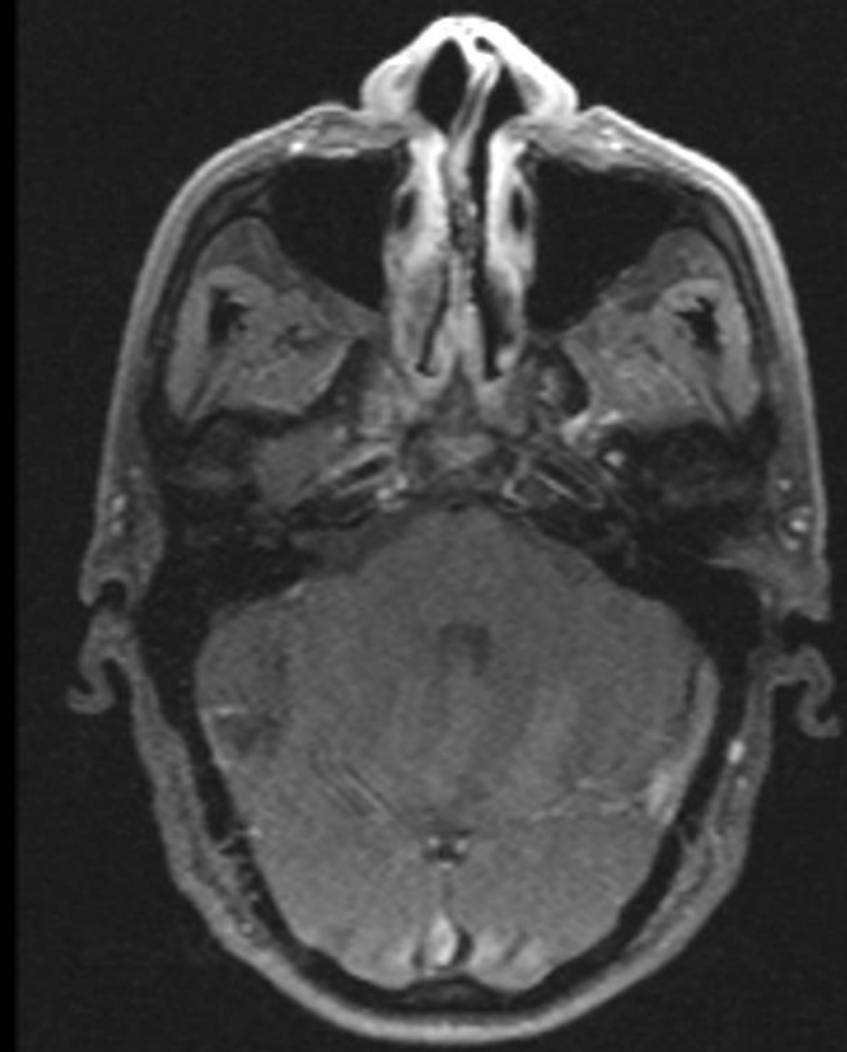



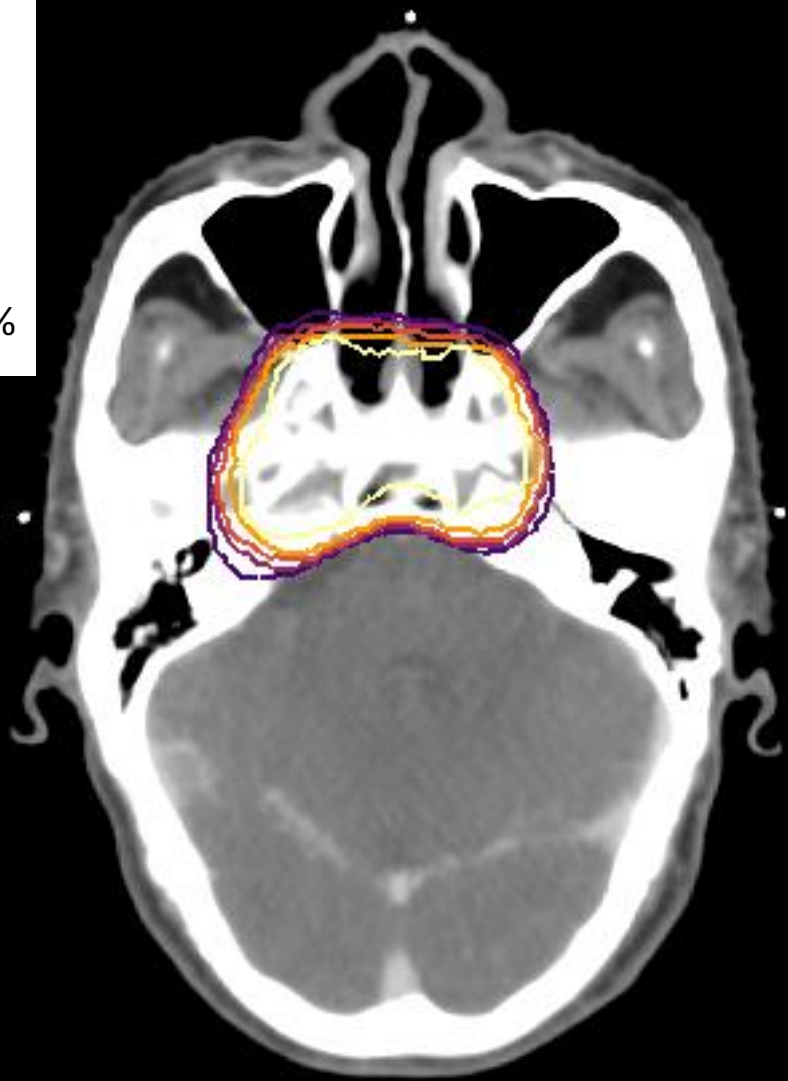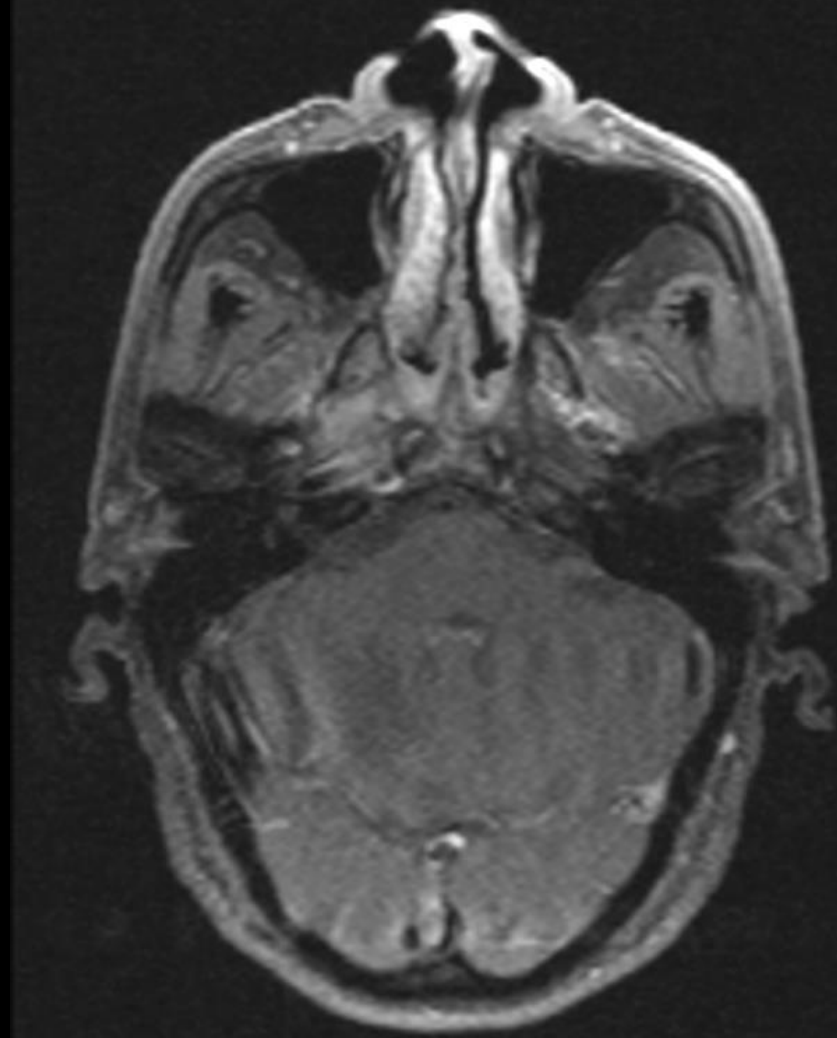

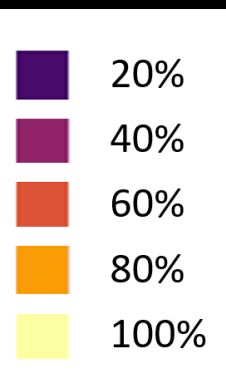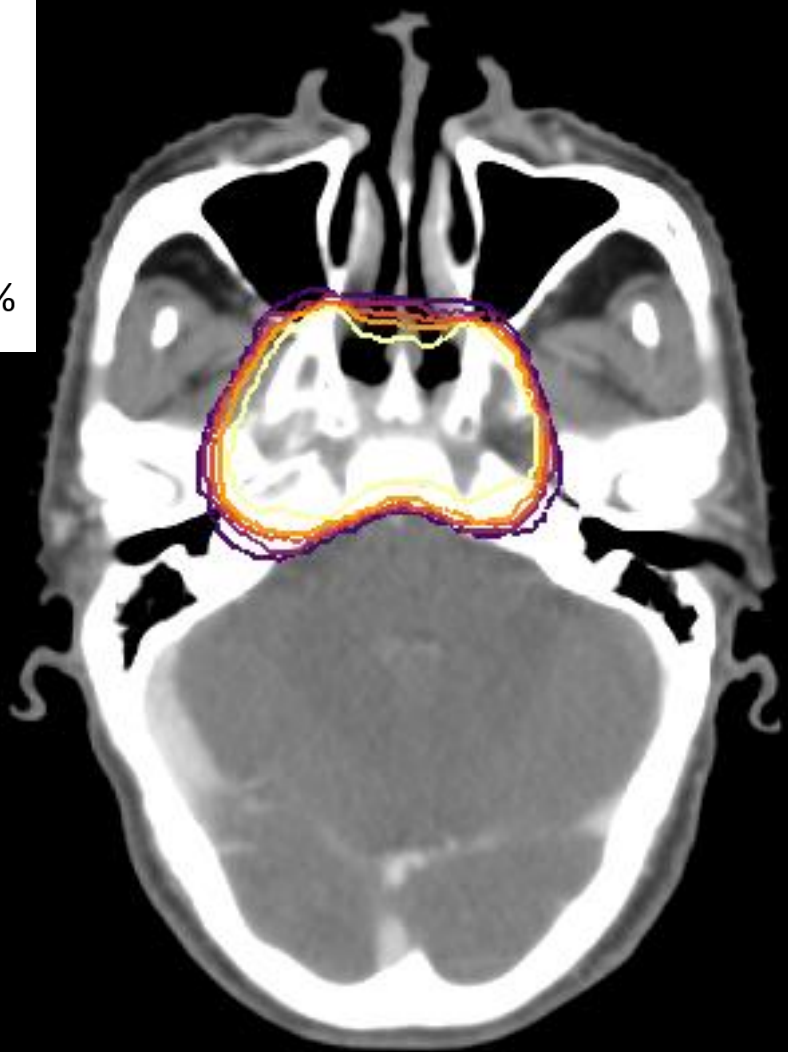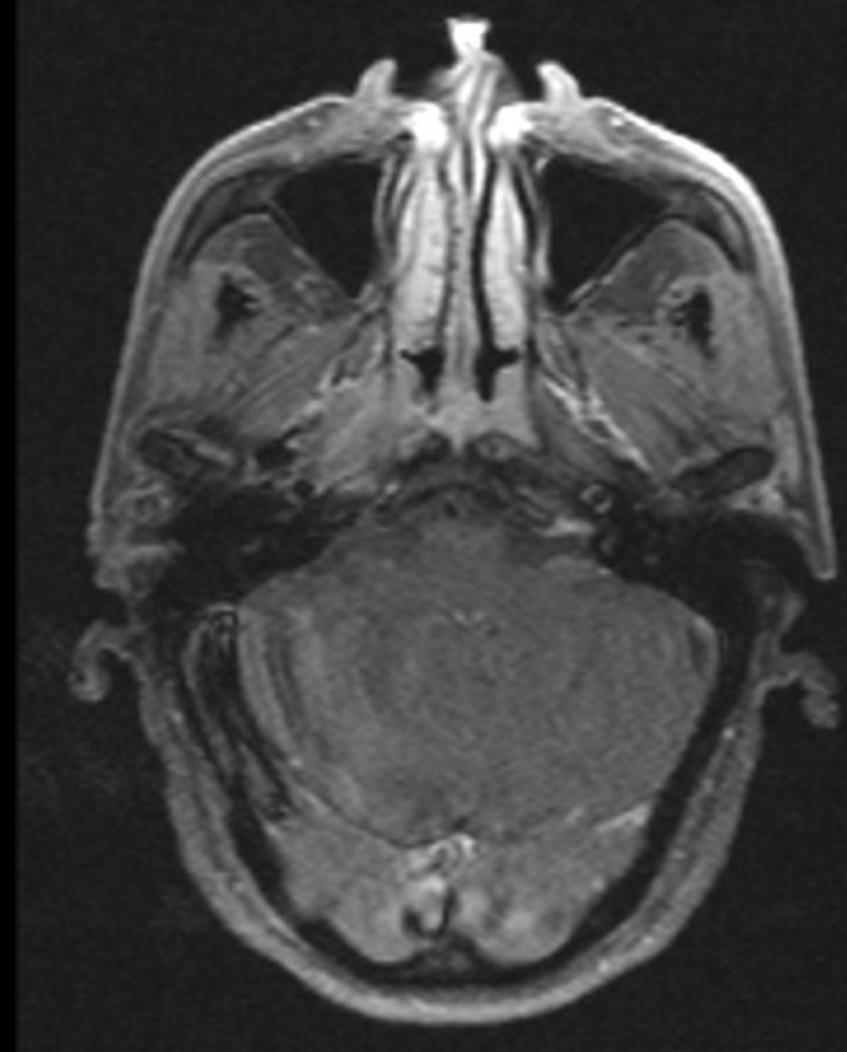

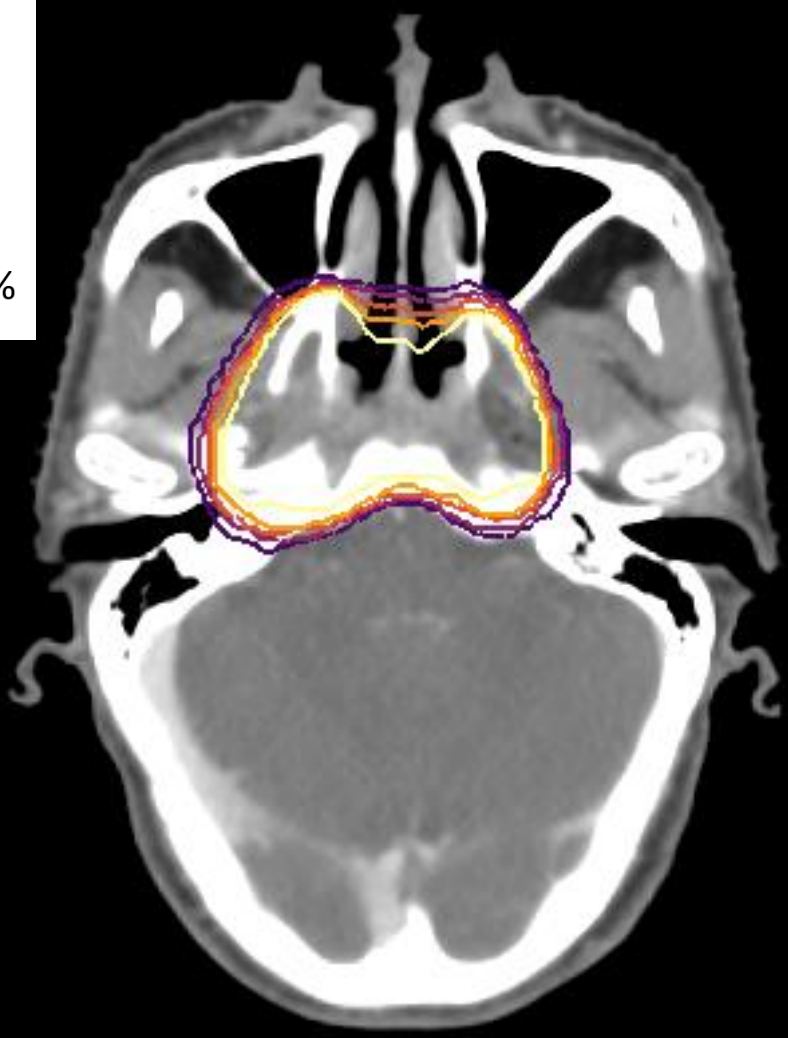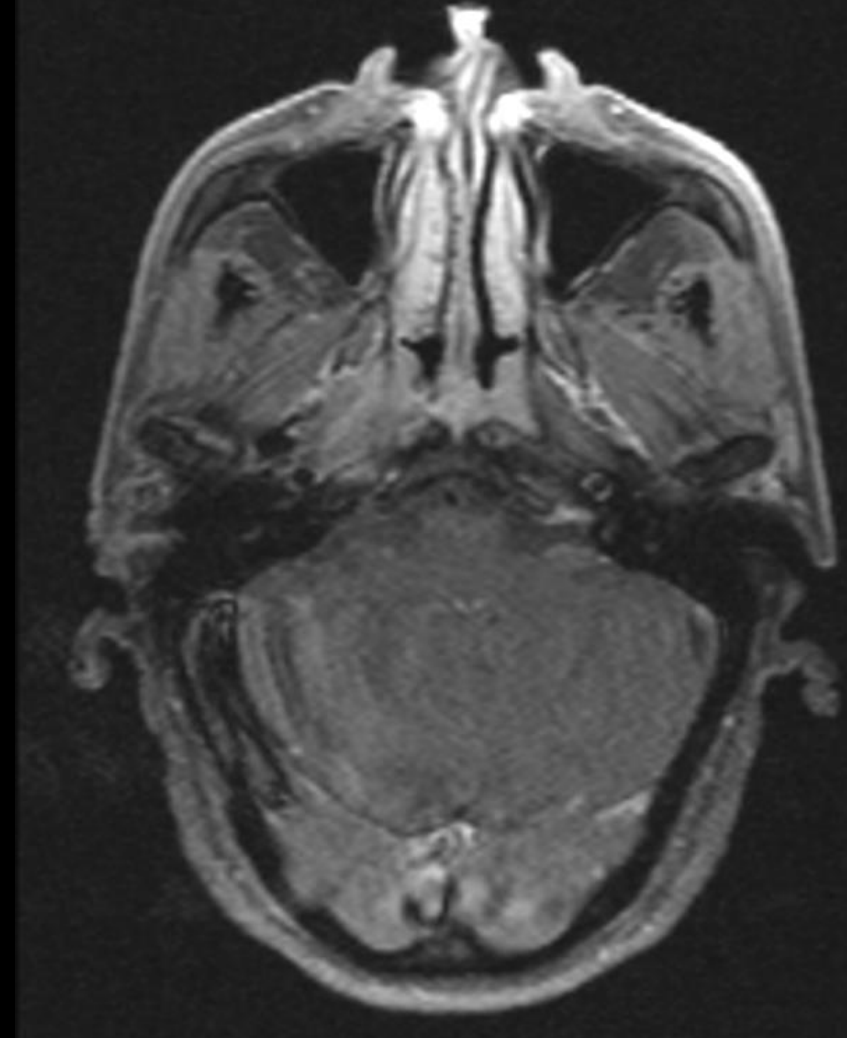

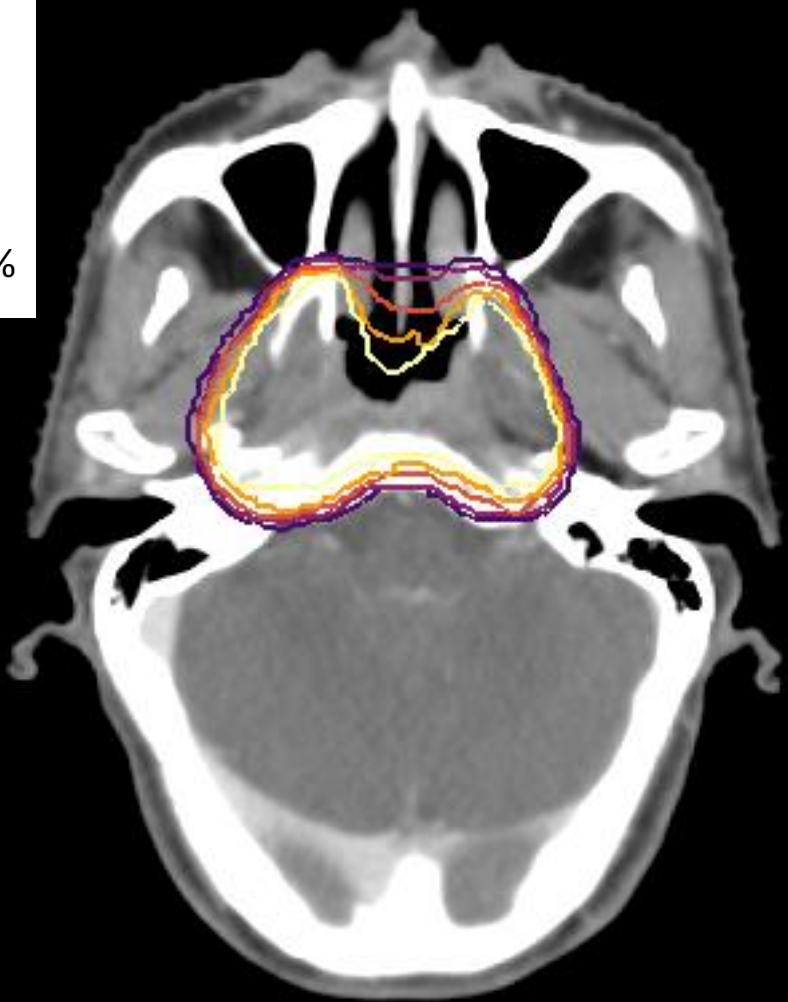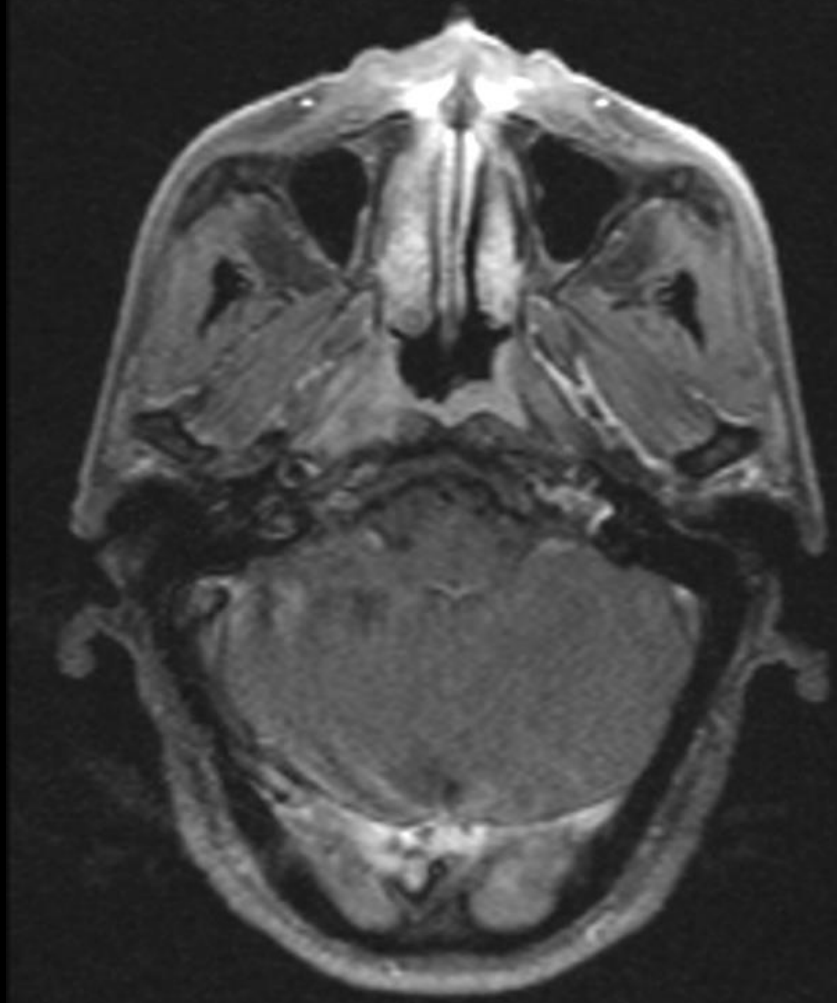

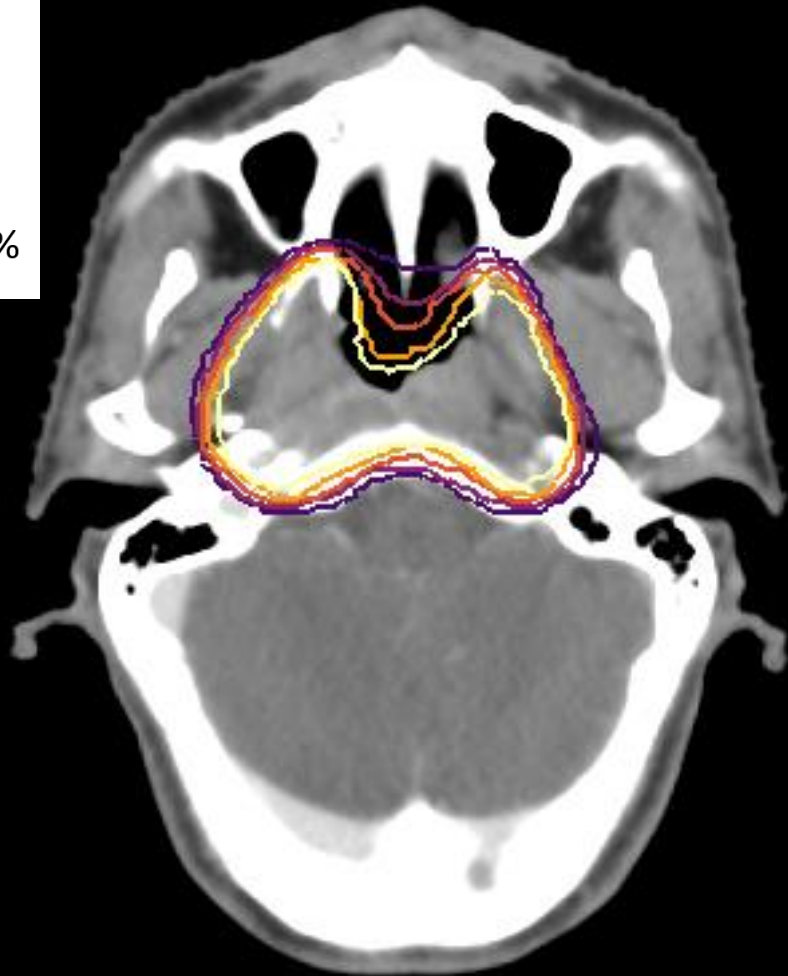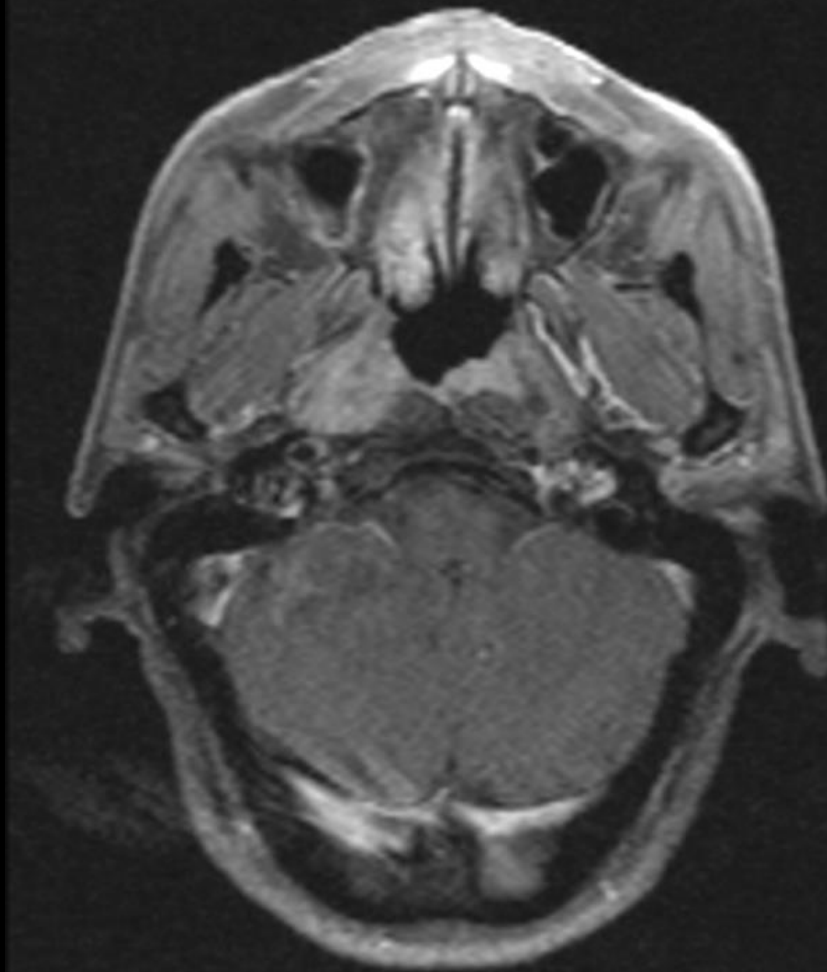

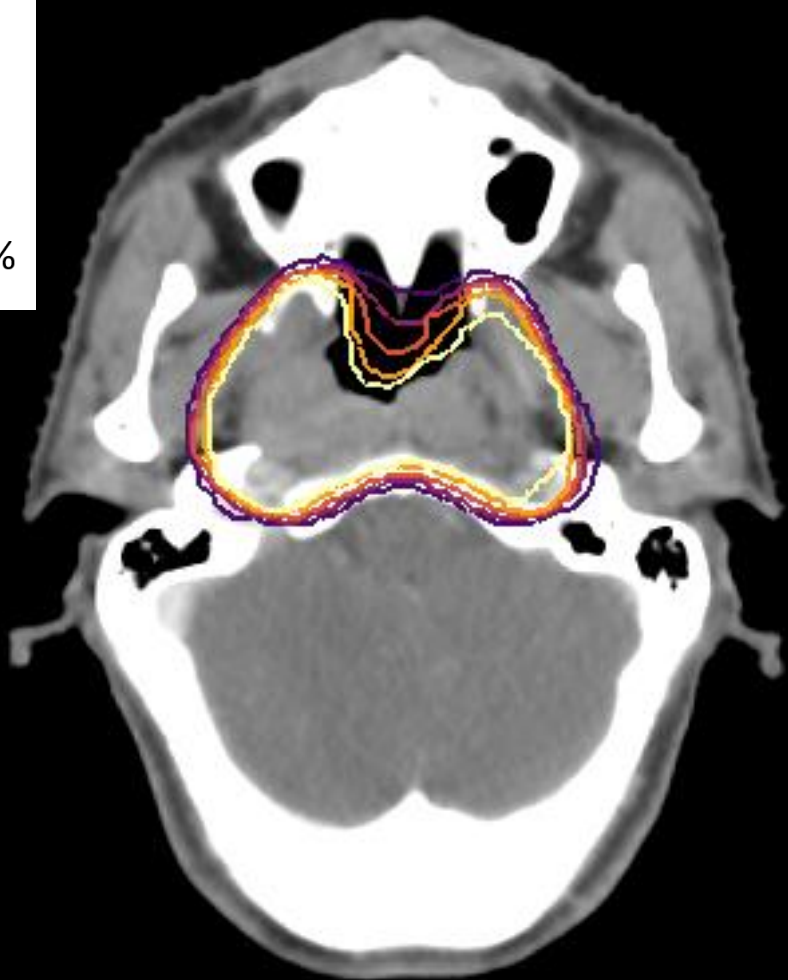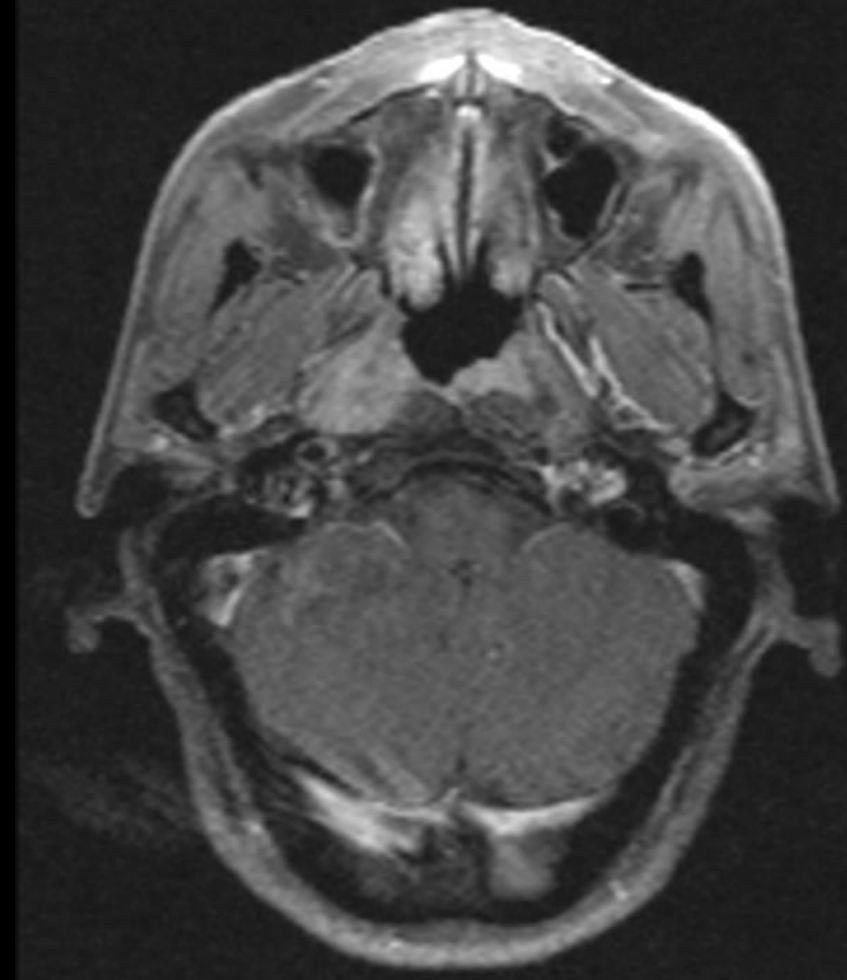

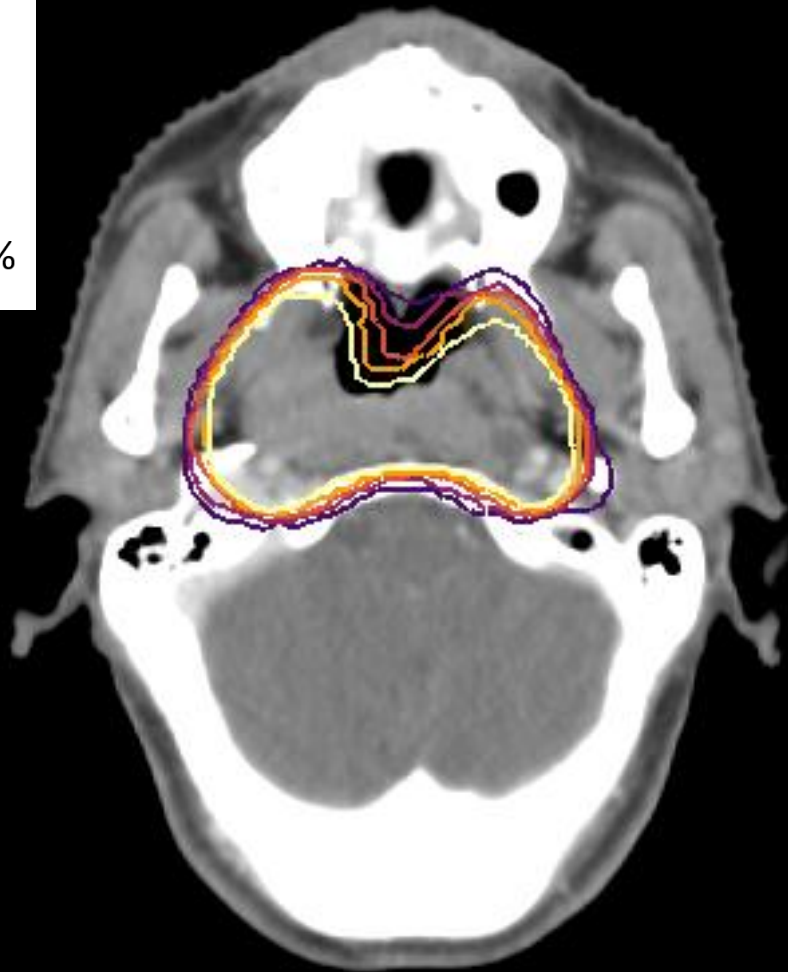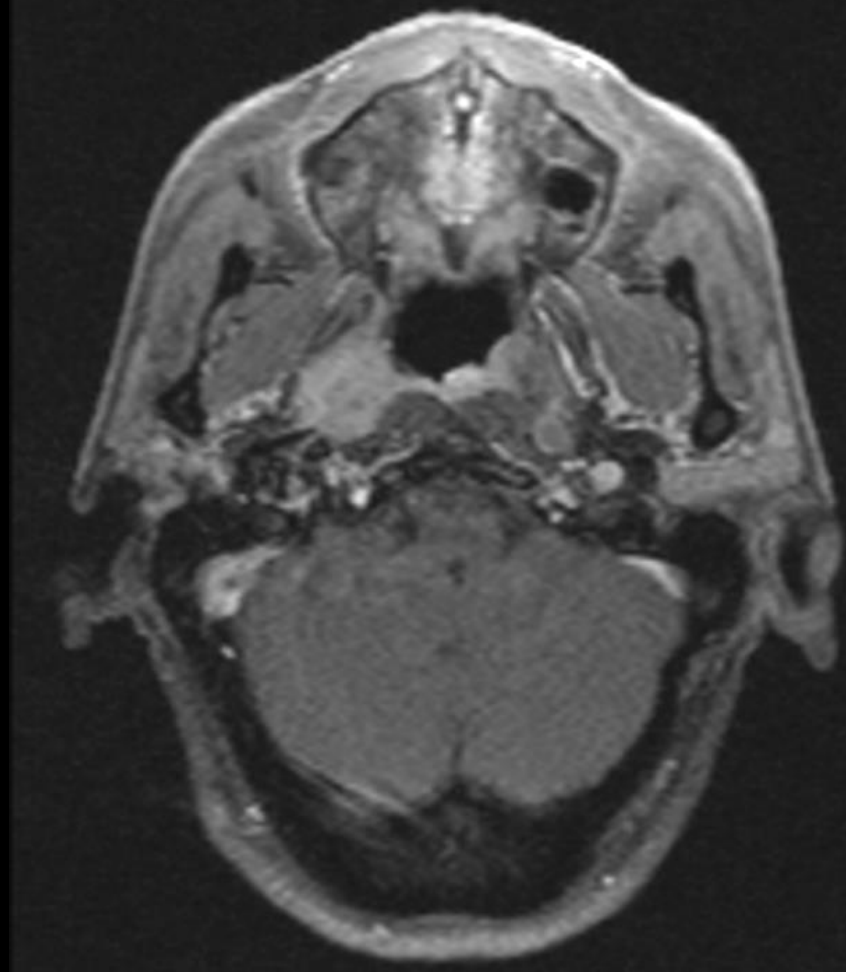

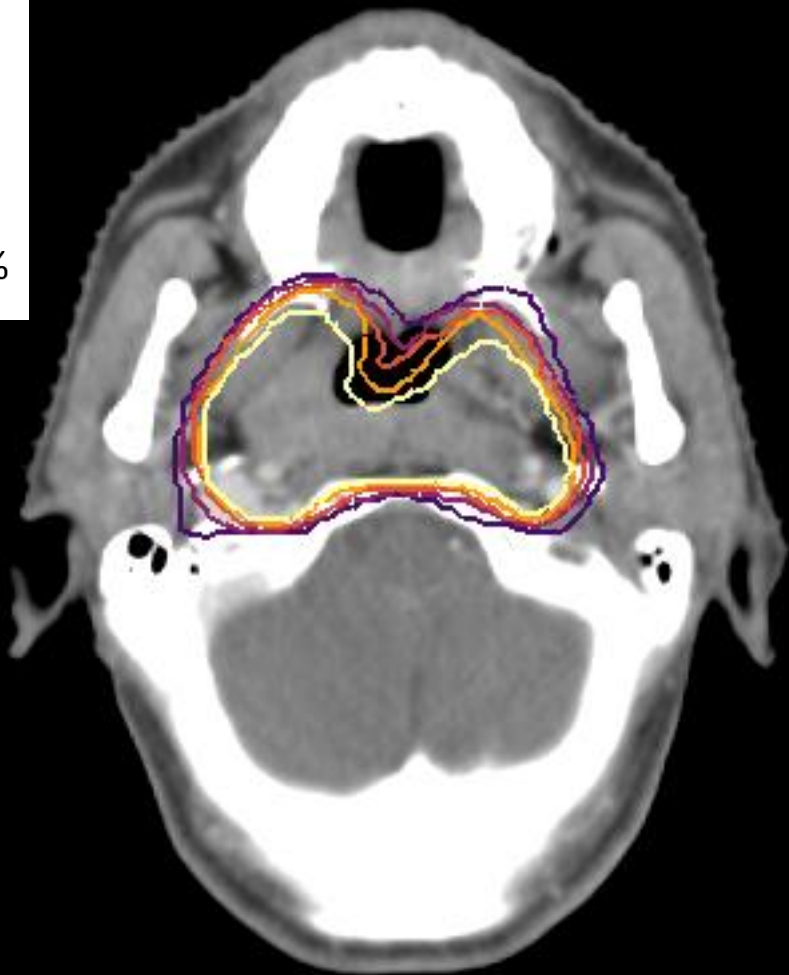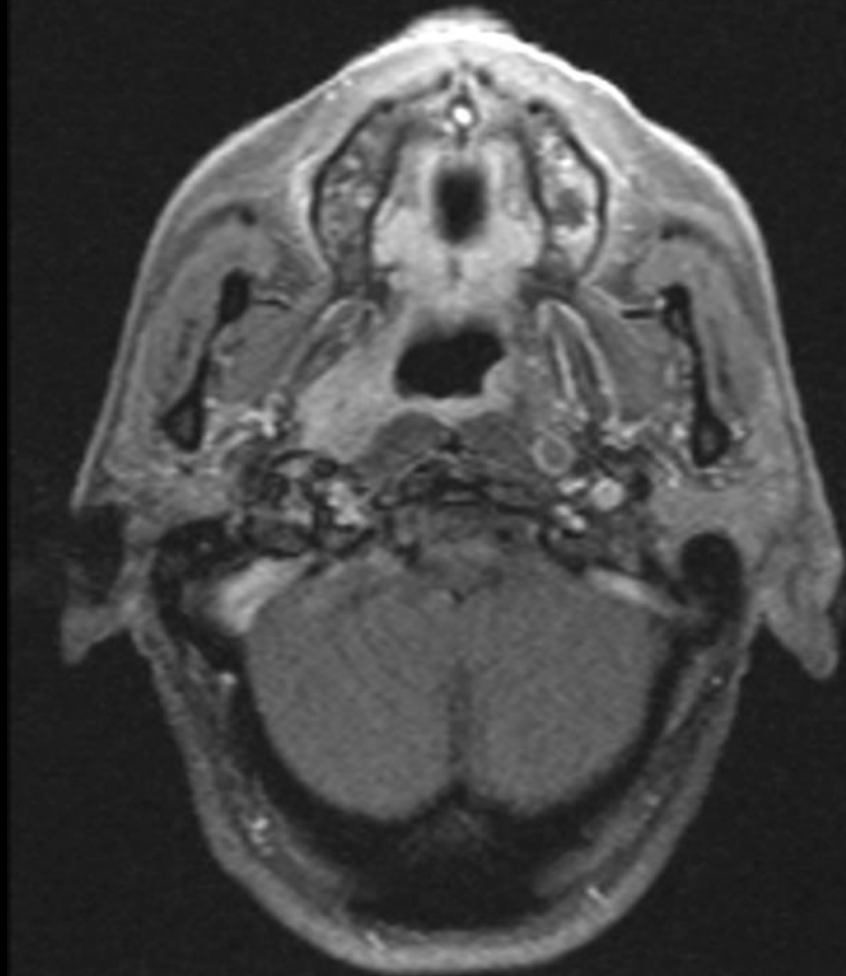



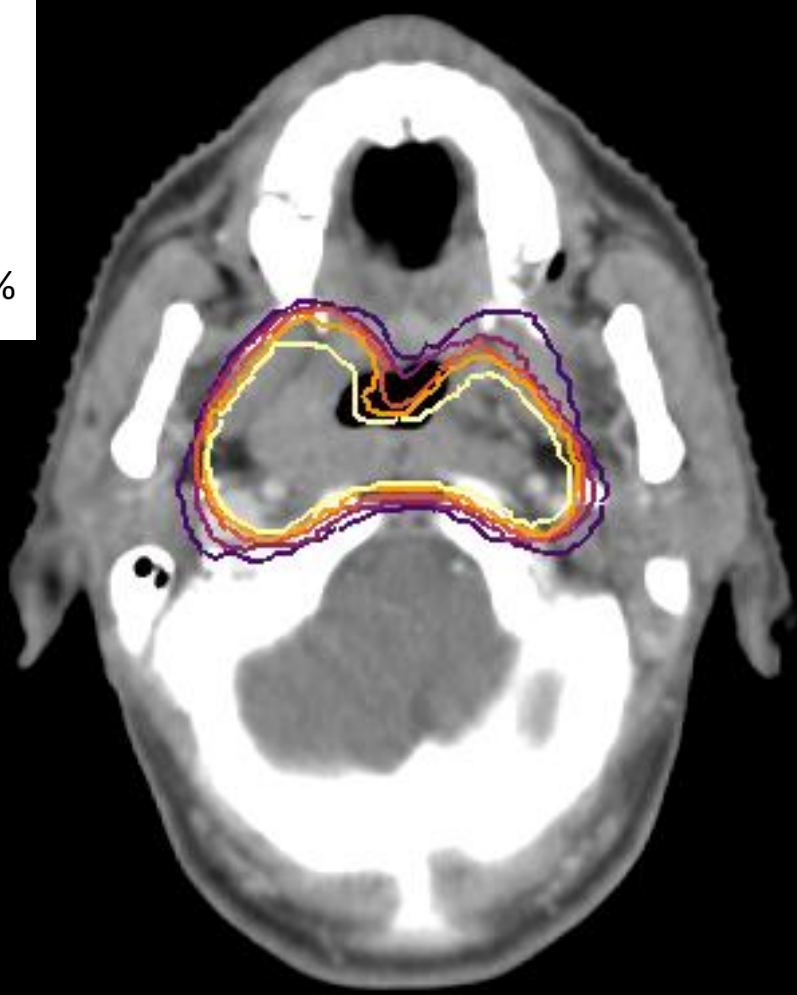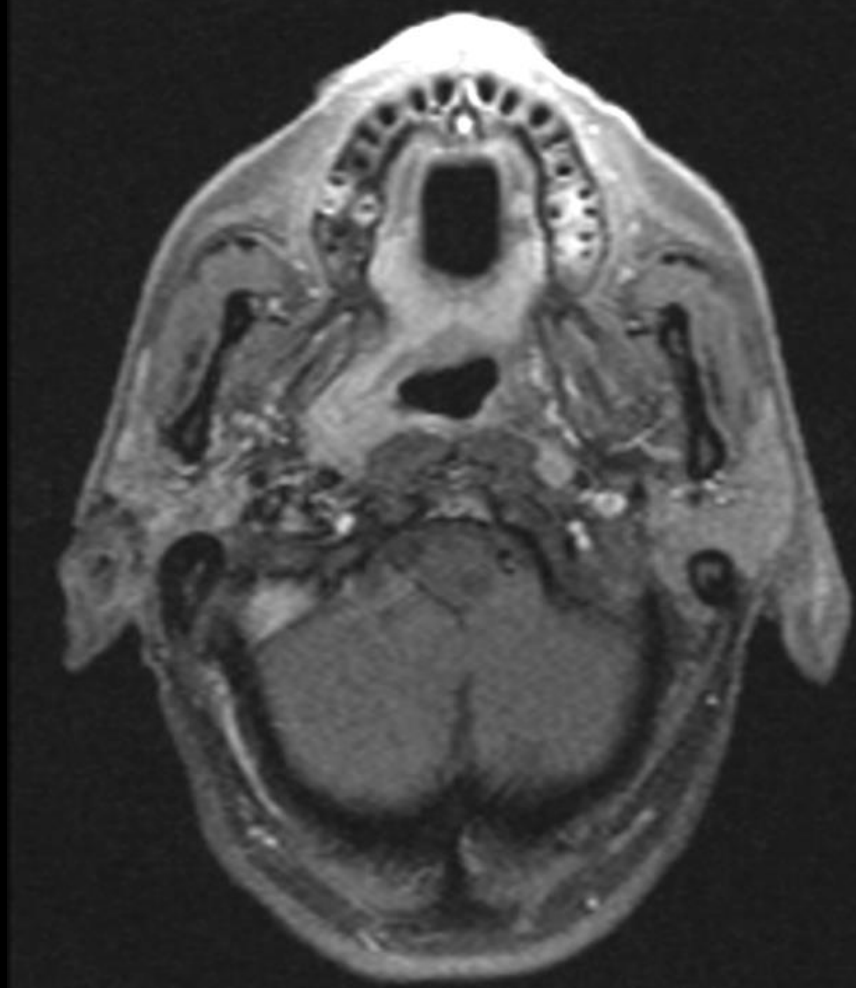

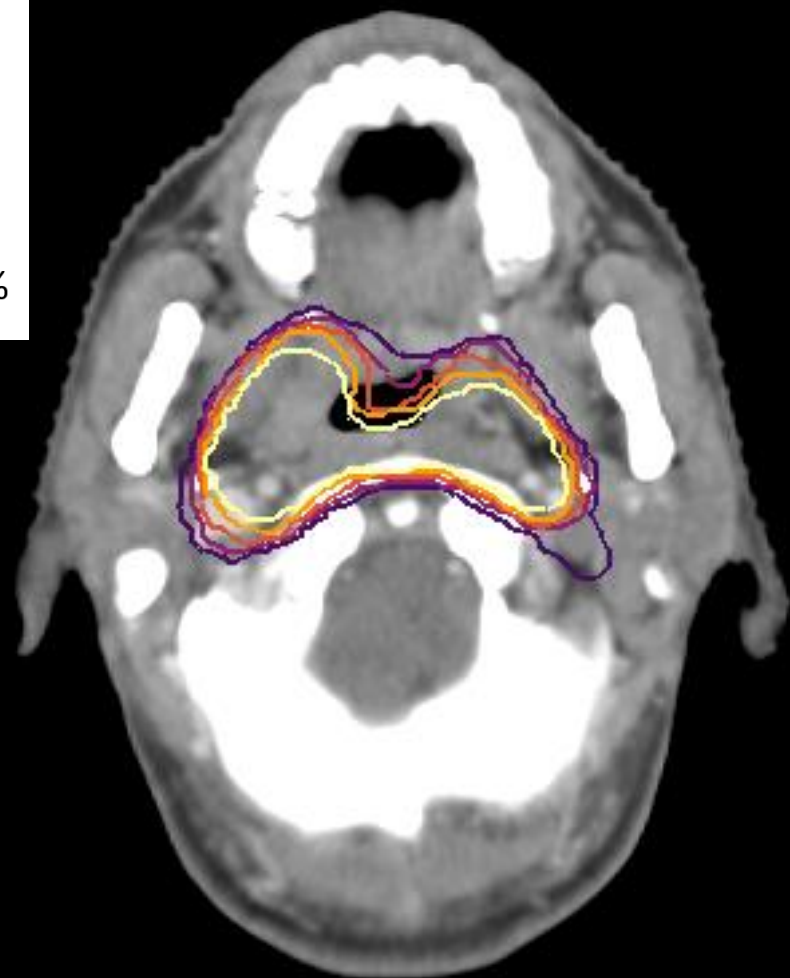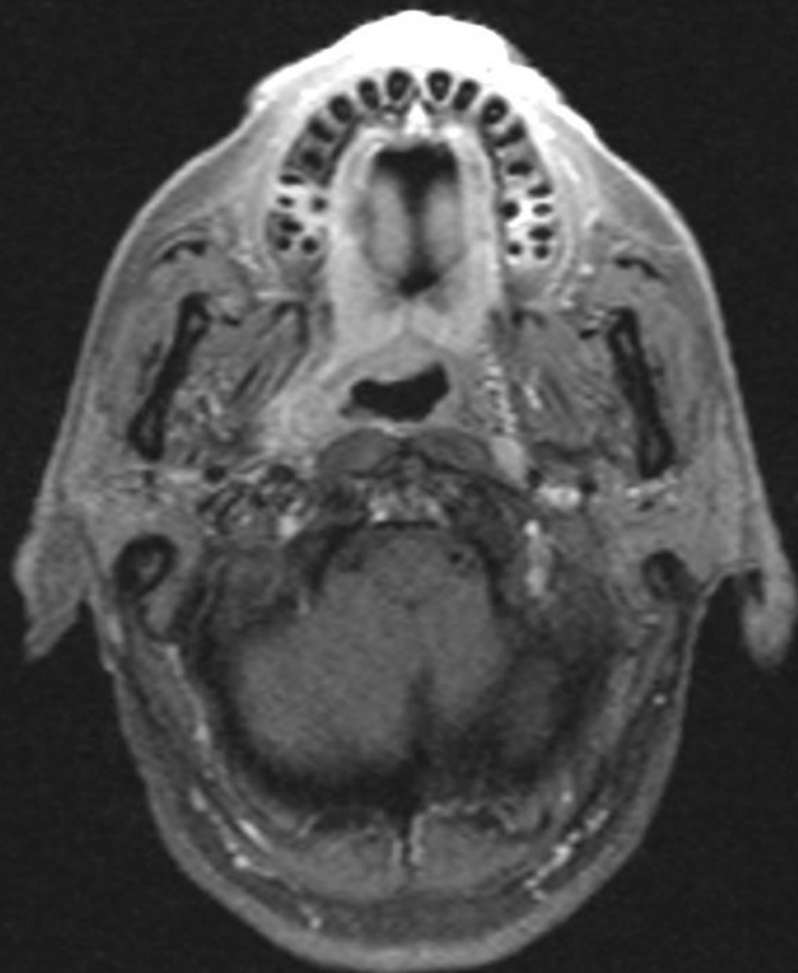

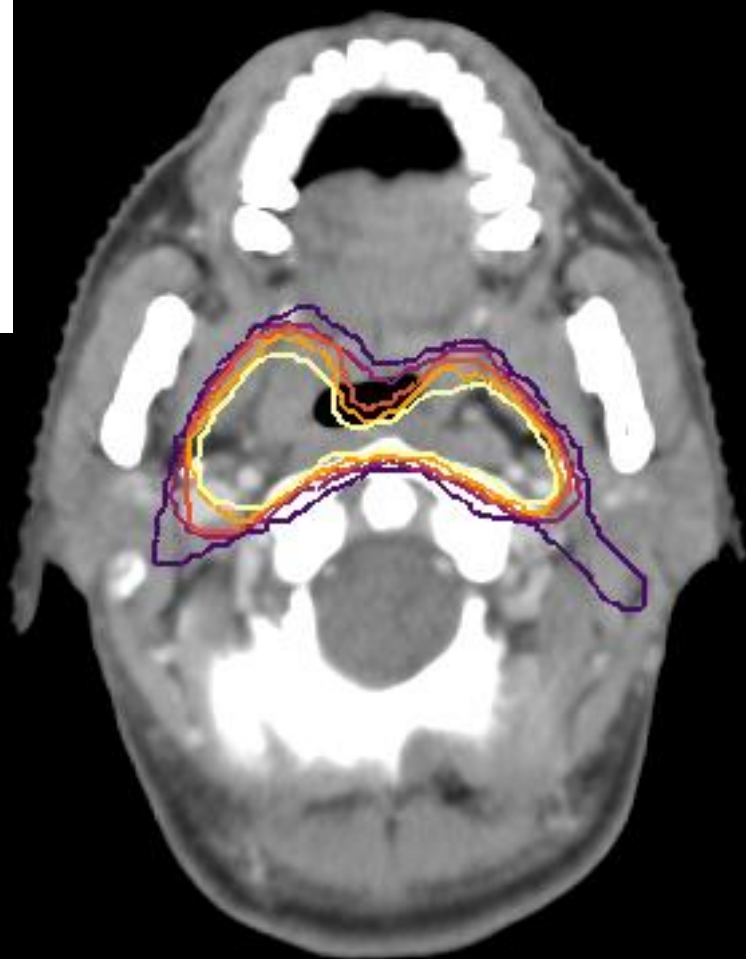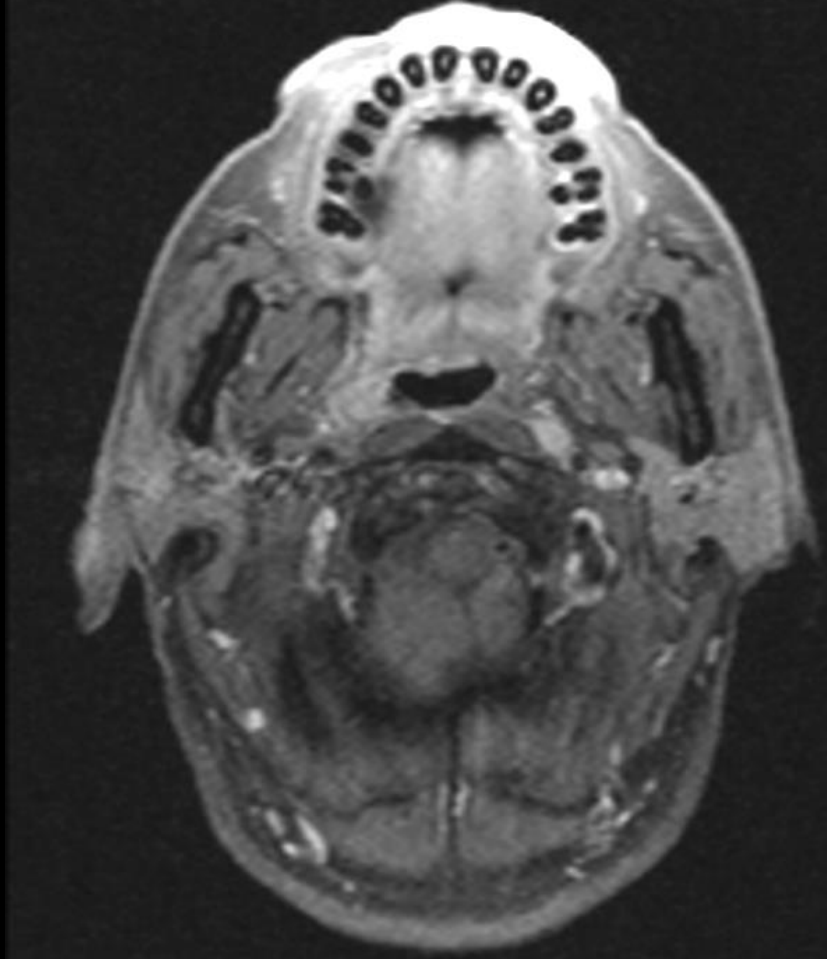

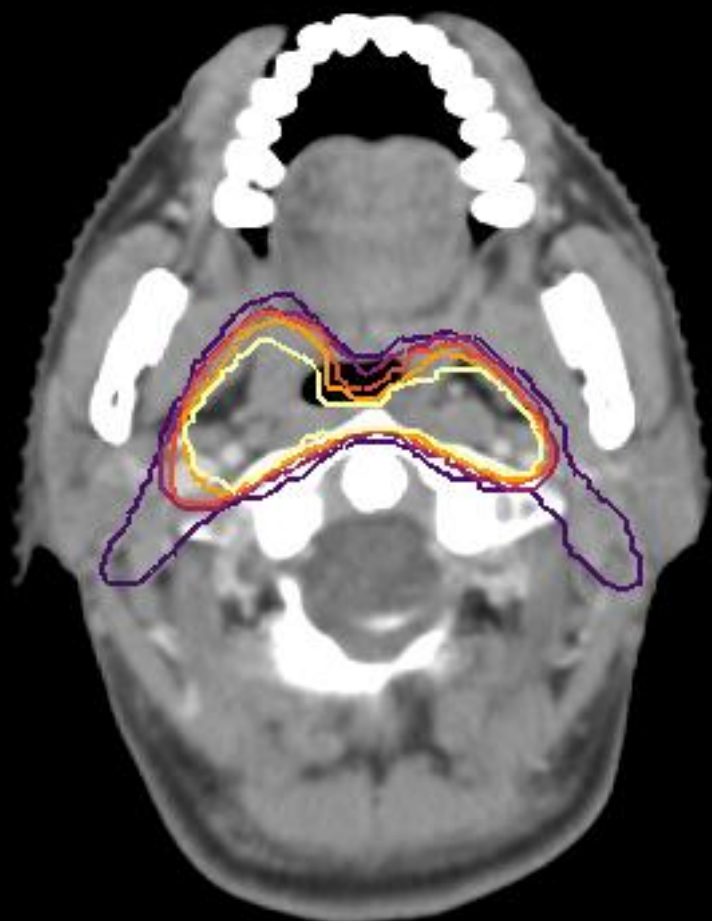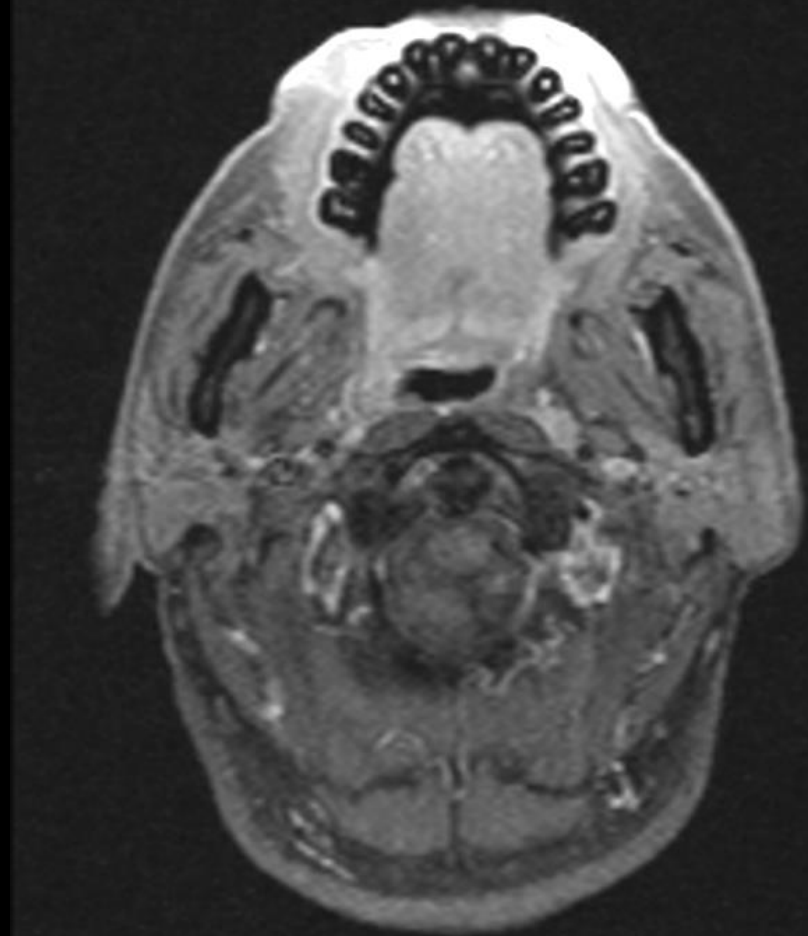

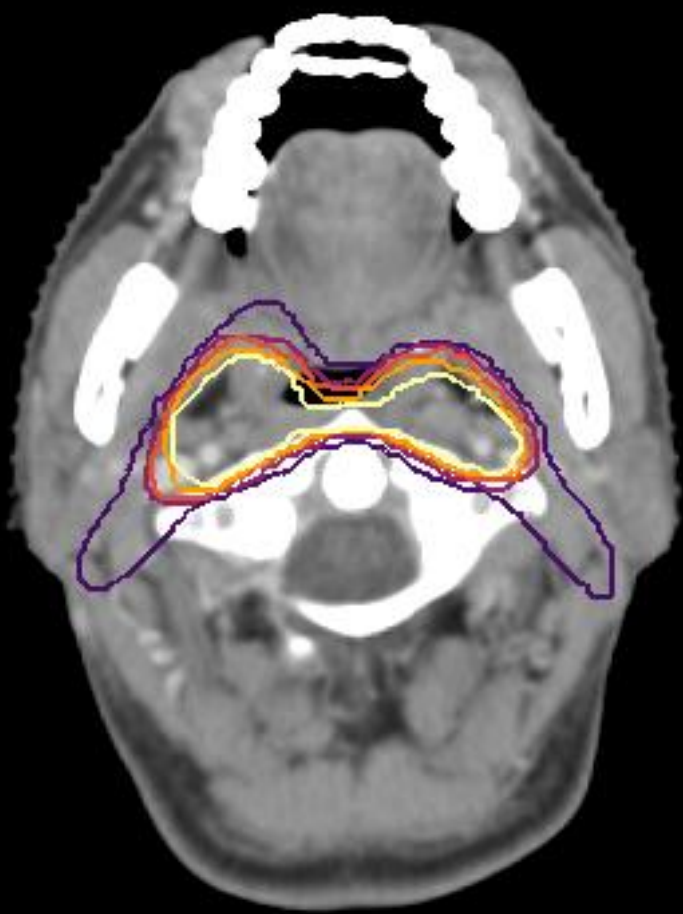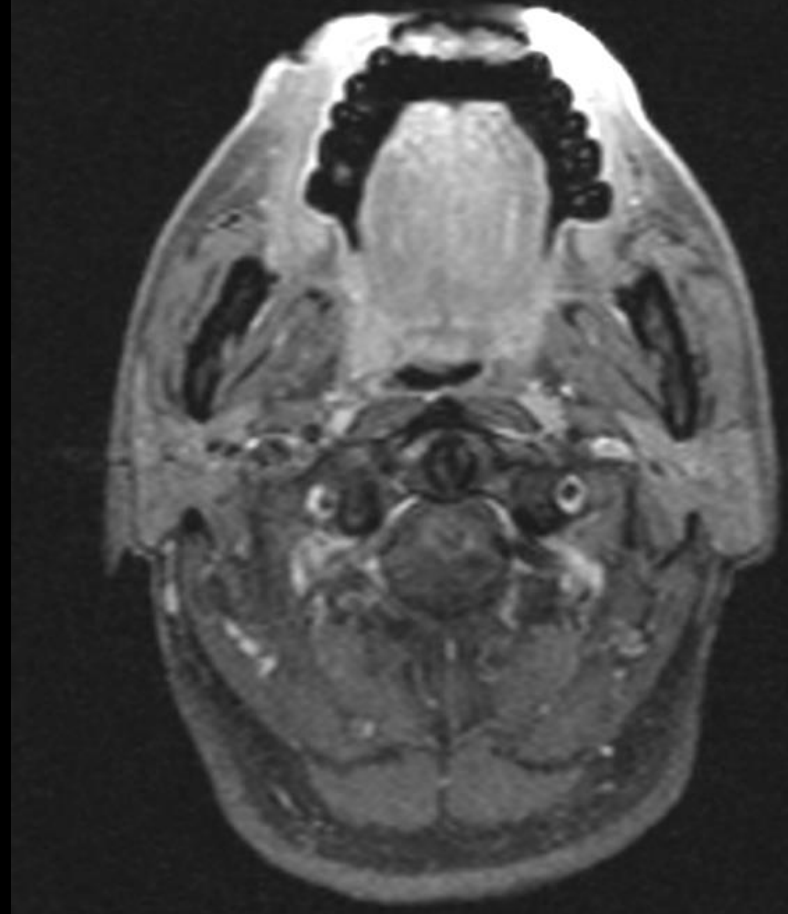

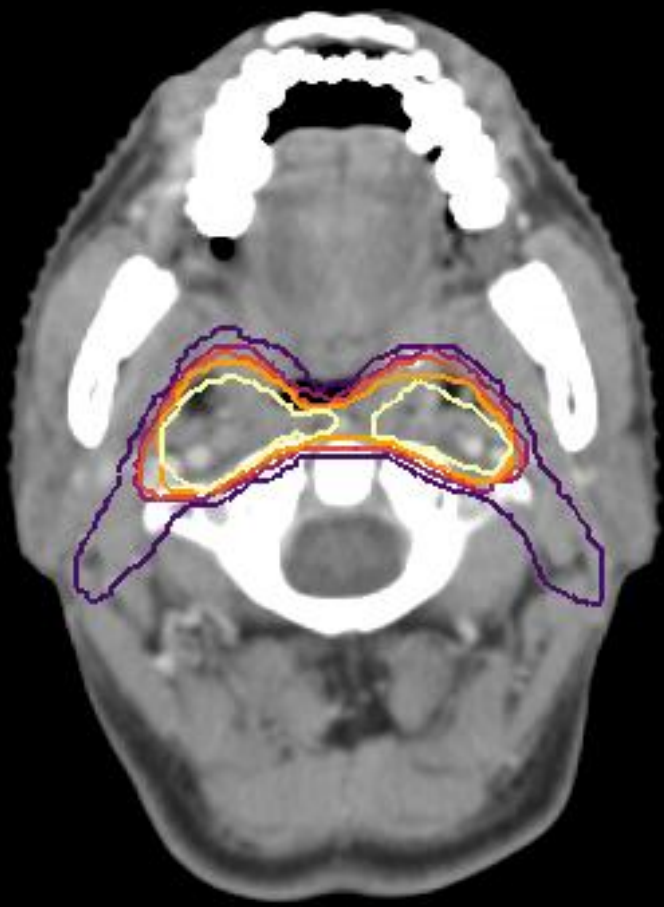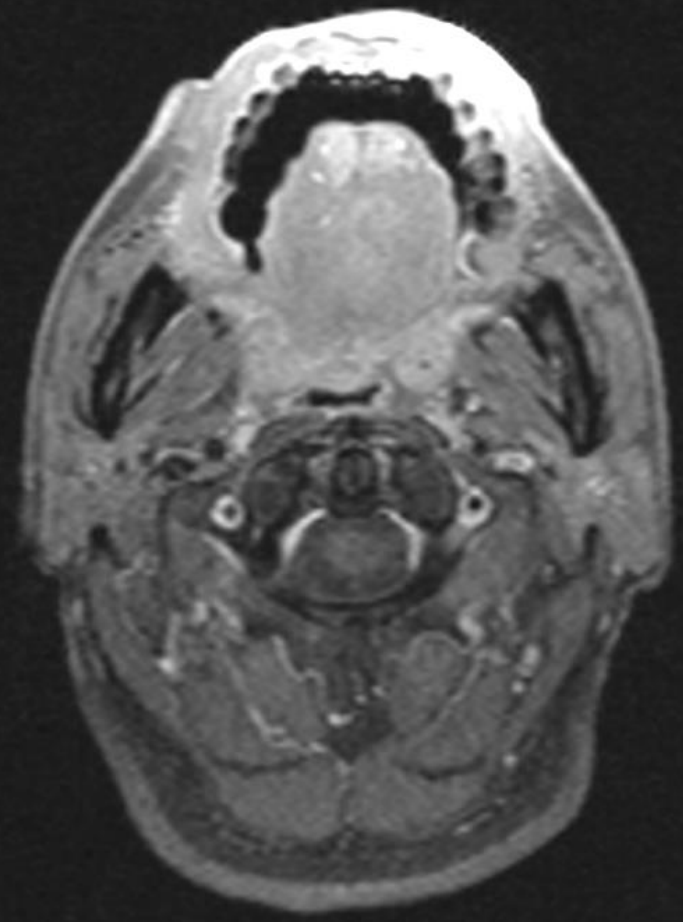

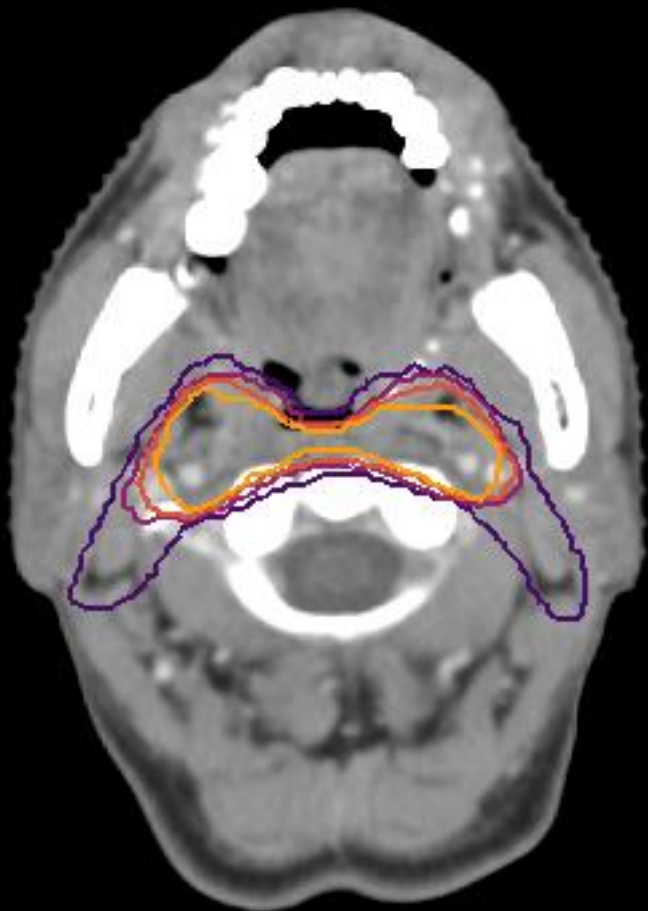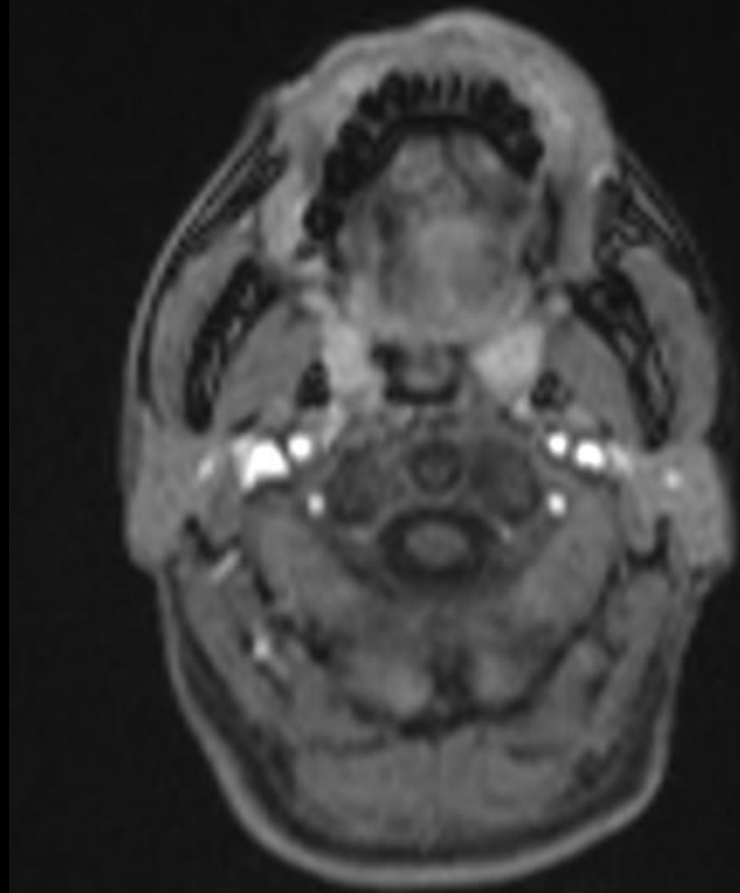

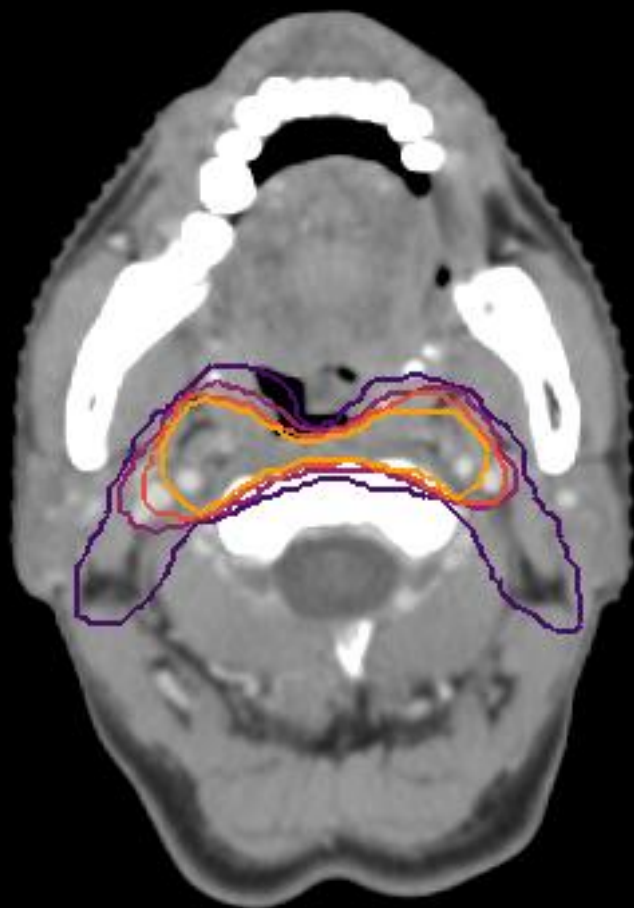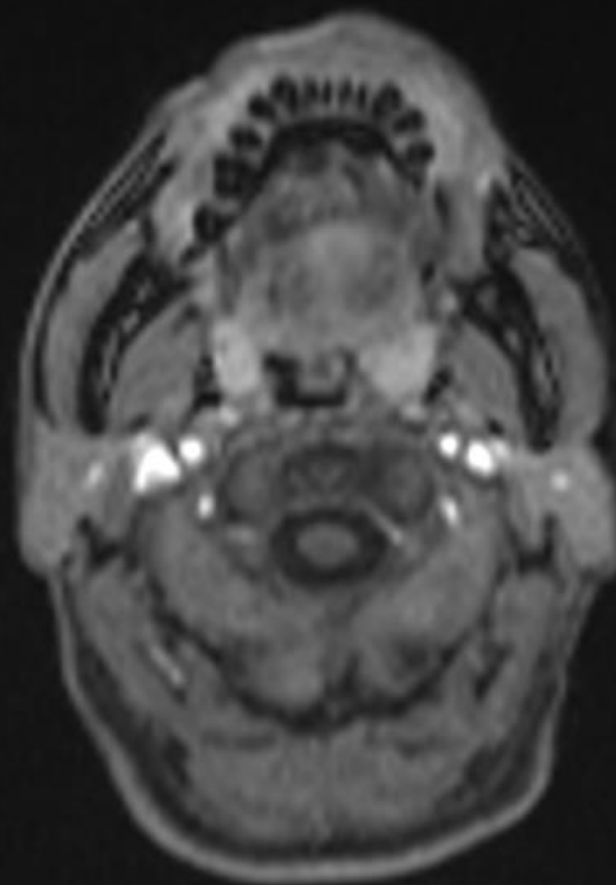



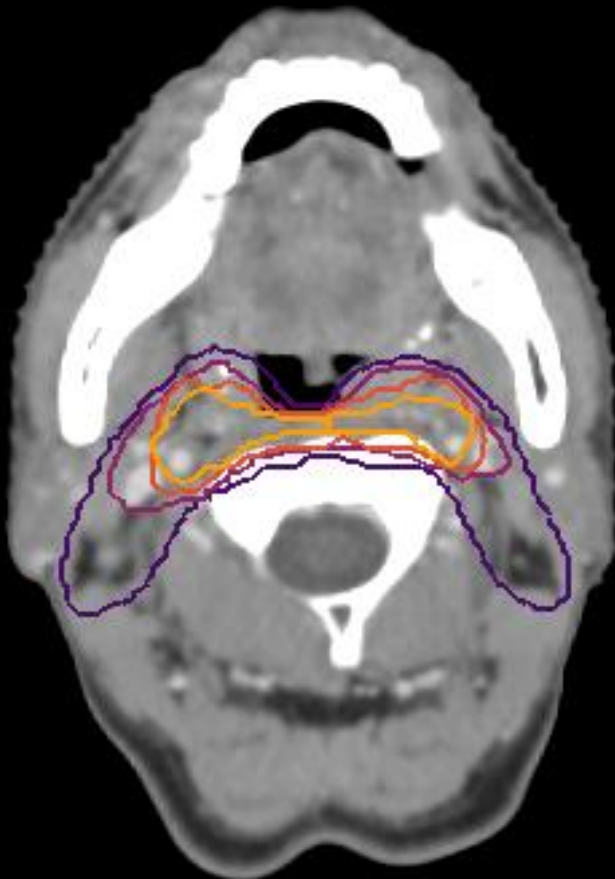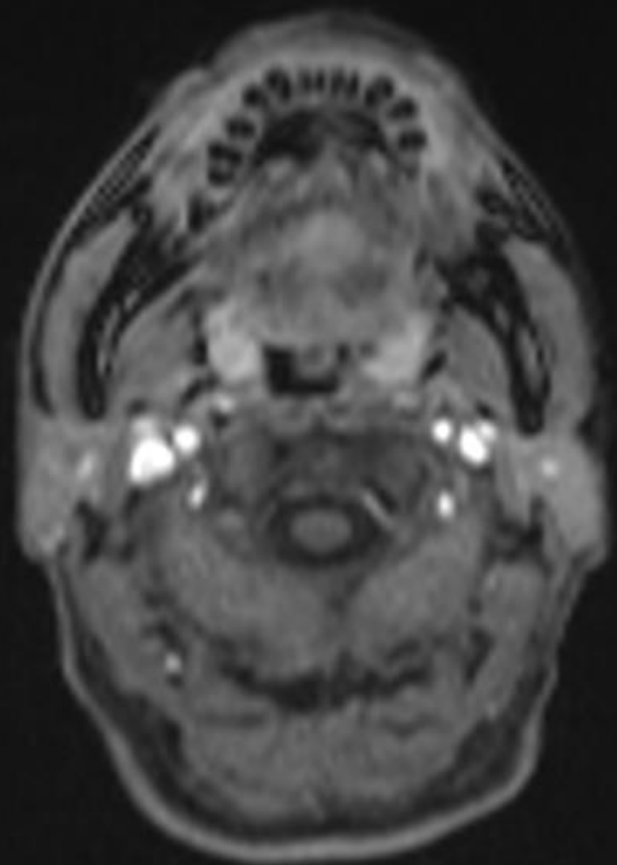

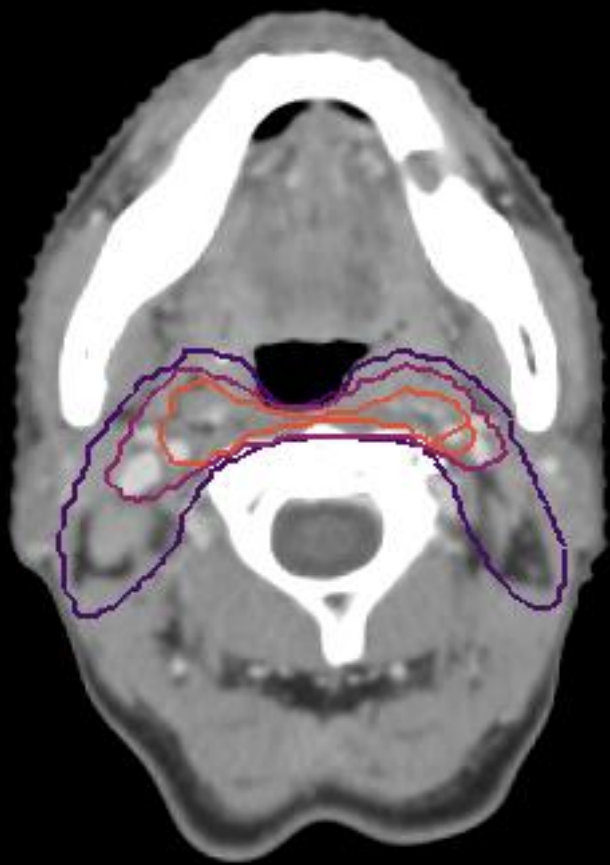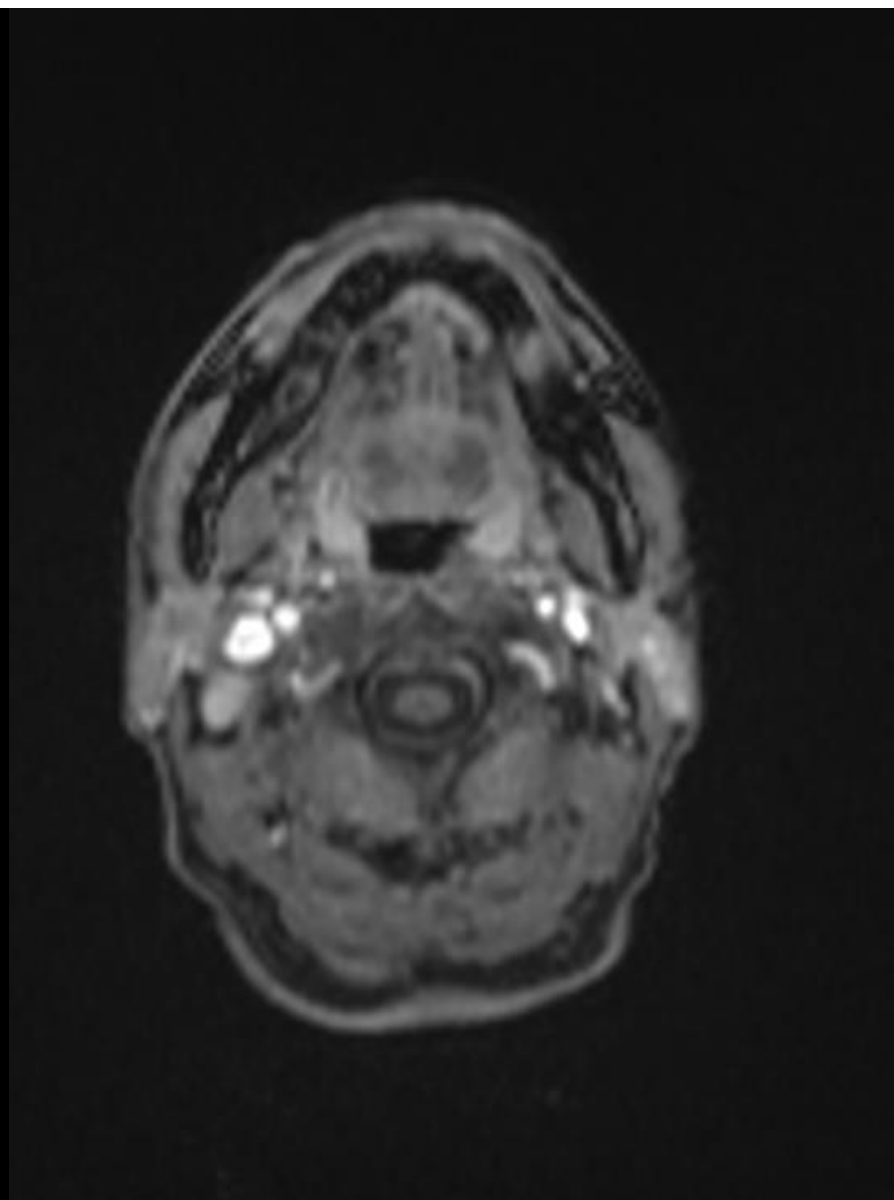

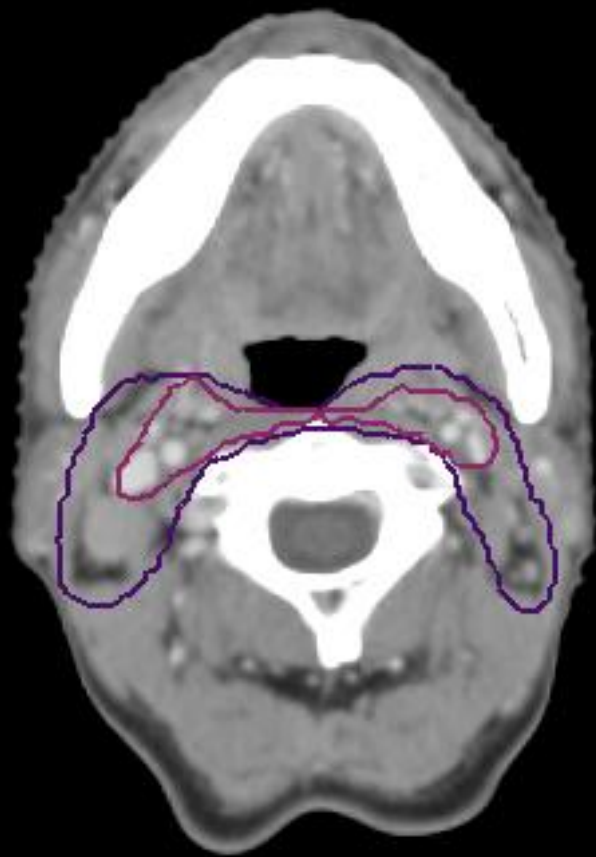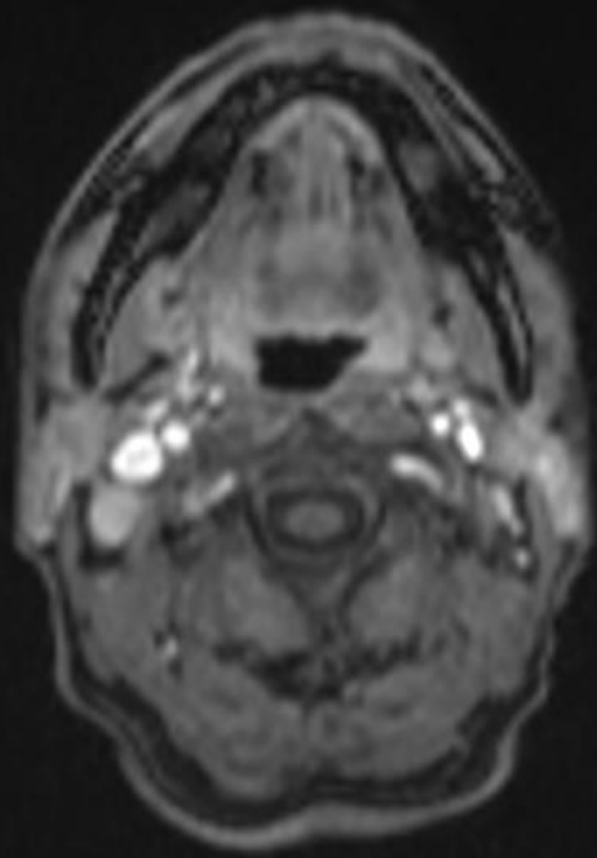

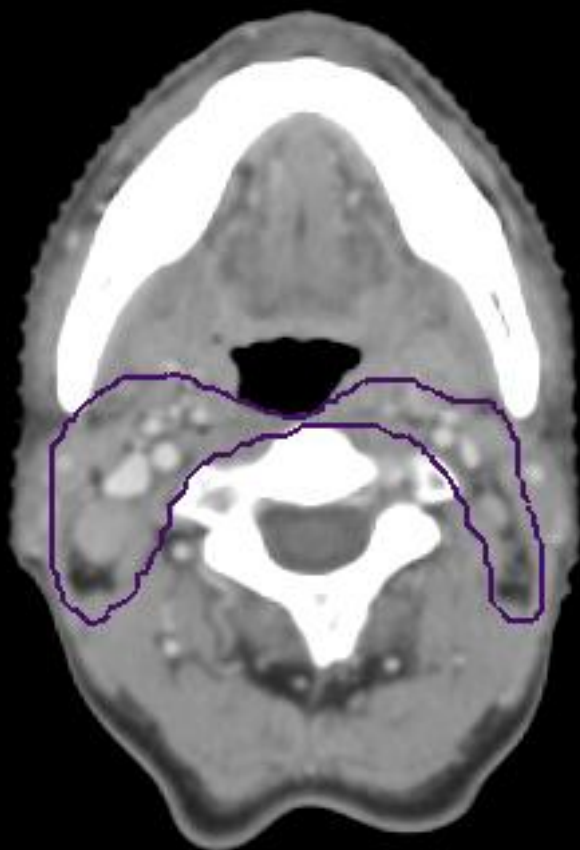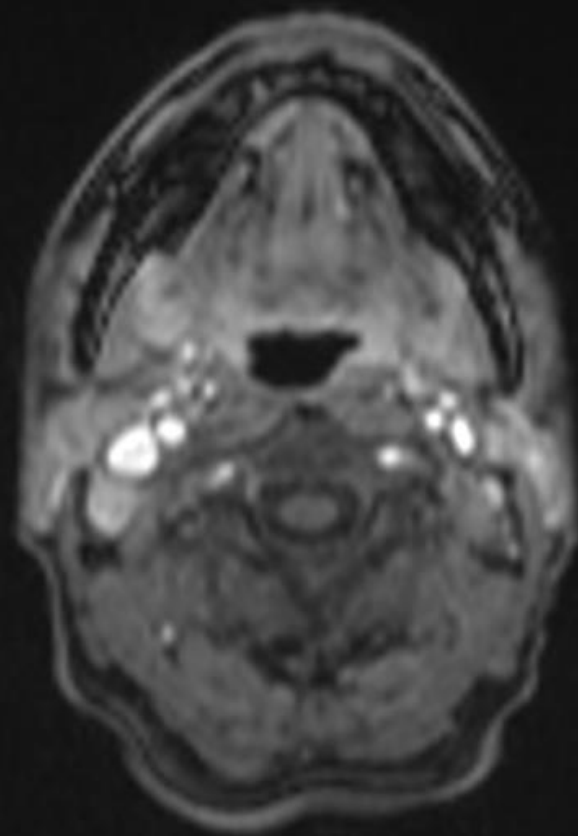

Supplement: Presentation_1.pdf [file Presentation_1.pdf]
